# Supplementary material
Source: PubMed Central journal article supplement (PMC193536)
Supplement: pnas_1731982100_6.pdf [file pnas_1731982100_6.pdf]

**Table 3. The chromosomal and plasmid genes disrupted by IS elements or phage genes in *P. syringae* pv. *tomato* DC3000**

|    | N-terminus | C-terminus | Gene assignment                                  |
|----|------------|------------|--------------------------------------------------|
| 1  | PSPTO0198  | PSPTO0195  | ISPsy5, Orf1                                     |
| 2  | PSPTO0843  | PSPTO0845  | ISPsy5, transposase                              |
| 3  | PSPTO0846  | PSPTO0841  | membrane protein, putative                       |
| 4  | PSPTO1018  | PSPTO1021  | hypothetical protein                             |
| 5  | PSPTO1225  | PSPTO1228  | insecticidal toxin protein                       |
| 6  | PSPTO1314  | PSPTO1316  | fimbrial biogenesis usher protein                |
| 7  | PSPTO0901  | -          | TTSS effector candidate HolPsyAG(Pto)            |
| 8  | PSPTO2329  | PSPTO2327  | response regulator                               |
| 9  | PSPTO2462  | PSPTO2459  | conserved hypothetical protein                   |
| 10 | PSPTO2540  | PSPTO2542  | conserved hypothetical protein                   |
| 11 | PSPTO3015  | PSPTO3012  | conserved hypothetical protein                   |
| 12 | PSPTO3431  | PSPTO3434  | ISPsy6, transposase                              |
| 13 | PSPTO3611  | PSPTO3614  | IS52, transposase                                |
| 14 | PSPTO4268  | PSPTO4271  | sulfate permease family protein                  |
| 15 | PSPTO4565  | PSPTO4568  | peptide ABC transporter, ATP-binding protein     |
| 16 | PSPTO4597  | PSPTO4595  | TTSS effector candidate HolPtoZ                  |
| 17 | PSPTO4724  | PSPTO4726  | TTSS effector candidate HopPtoD1-related protein |
| 18 | PSPTO4728  | PSPTO4731  | ISPsy10, transposase                             |
| 19 | PSPTO4993  | PSPTO4996  | TTSS effector candidate HolPtoAC                 |
| 20 | PSPTO5366  | PSPTO5369  | ISPsy4, transposase                              |
| 21 | PSPTO5572  | PSPTO5570  | membrane protein                                 |
| 22 | PSPTO5574  | PSPTO5577  | response regulator                               |
| 23 | PSPTOB0038 | PSPTOB0041 | transcriptional regulator, GntR family           |
