# Supplementary material
Source: PubMed Central journal article supplement (PMC193536)
Supplement: pnas_1731982100_7.pdf [file pnas_1731982100_7.pdf]

**Table 4. IS elements present in *P. syringae* pv. *tomato* DC3000**

| Element | Family       | Copies <sup>a</sup> | Length / DR <sup>b</sup> |      | Structure | Left and right ends of newly identified elements (5'-3')                          |
|---------|--------------|---------------------|--------------------------|------|-----------|-----------------------------------------------------------------------------------|
| IS52    | IS5          | 3(2)                | ND <sup>c</sup>          | ND   | Orf A     | previously identified: M14366                                                     |
| ISPs1   | IS5          | 1(2)                | ND                       | ND   | Orf AB    | previously identified: M11035                                                     |
| ISPsy5  | IS5          | 36(8)               | ND                       | ND   | Orf A     | previously identified: AB023075                                                   |
| ISPsy3  | IS91         | 2(4)                | ND                       | ND   | Orf A     | previously identified: AB063176                                                   |
| ISPsy4  | IS21         | 23(1)               | 1962                     | 6    | Orf AB    | TGTCACCGCCACTGTAAAAATGACCCCCTAACGCCAAC<br>TGTC AACGCCAACTAAAAAGTGACCCCCTTCCGTGCTA |
| ISPsy5  | IS66         | 35(13)              | 2059                     | 8    | Orf AB    | GTATCCGATCCACGAACCCACATTTCAAGCCACTGGC<br>GTAAGCGATCCACCAACCACACCTACCATCAGATGCGG   |
| ISPsy6  | unclassified | 14(1)               | 1603                     | 4(5) | Orf A     | CAGACTGTGTGAAAACCTAGCAATCTGCGCAGCGCTCA<br>CAGACTGTGTGAAAACACACTGATGAAGGCCCAAGCAA  |
| ISPsy7  | IS110        | 10                  | 1356                     | 0    | Orf A     | ATAATGAGATGGTCAGCCCGATCCGAGAAACCCGGAGT<br>TAGGCAAATGTATGGTCAGCCCACCTCCTGCAATCGCA  |
| ISPsy8  | IS3          | 5                   | 1432                     | 3    | Orf AB    | TGGACTGCCCCCAAGAAGTTGGACACCAATCCGACCTA<br>TGGACTGCCCCCGGAAGTTGGACAGTTTTAGCTTGCC   |
| ISPsy9  | IS3          | 1                   | 1452                     | 3    | Orf AB    | TGGTGTGACCCCCGAAGTTGGATGCAACCTTTGGAGG<br>TGGTGTGACCCCCGAAGTTGGACAATTATCCACCTAC    |
| ISPsy10 | IS5          | (3)                 | ND                       | ND   | Orf A     | ND<br>ND                                                                          |
| ISPsy11 | IS3          | 3                   | 1313                     | 3    | Orf AB    | TGTCCCGTCCTGAATAAGGTTTACACCTTCTGACCTTT                                            |

|              |     |    |    |        |                                                    |
|--------------|-----|----|----|--------|----------------------------------------------------|
| ISPsy12 IS3  | 1   | ND | ND | Orf AB | TGTCTAGTCCTGAAATAGGTTTACACCTGTTTCACGCT<br>ND<br>ND |
| ISPsy13 IS3  | 1   | ND | ND | Orf AB | ND<br>ND                                           |
| ISPsy14 IS21 | 1   | ND | ND | Orf AB | ND<br>ND                                           |
| ISPsy15 IS5  | (2) | ND | ND | Orf A  | ND<br>ND                                           |

---

<sup>a</sup> The number of full-length copies and the number of incomplete copies in parentheses.

<sup>b</sup> Size in base pairs of the element (length) and the direct repeat (DR) generated by insertion into the target site.

<sup>c</sup> ND = not determined.

**Table 4. IS elements present in *P. syringae* pv. *tomato* DC3000**

| Element | Family       | Copies <sup>a</sup> | Length / DR <sup>b</sup> |      | Structure | Left and right ends of newly identified elements (5'-3')                          |
|---------|--------------|---------------------|--------------------------|------|-----------|-----------------------------------------------------------------------------------|
| IS52    | IS5          | 3(2)                | ND <sup>c</sup>          | ND   | Orf A     | previously identified: M14366                                                     |
| ISPs1   | IS5          | 1(2)                | ND                       | ND   | Orf AB    | previously identified: M11035                                                     |
| ISPssy  | IS5          | 36(8)               | ND                       | ND   | Orf A     | previously identified: AB023075                                                   |
| ISPsy3  | IS91         | 2(4)                | ND                       | ND   | Orf A     | previously identified: AB063176                                                   |
| ISPsy4  | IS21         | 23(1)               | 1962                     | 6    | Orf AB    | TGTCACCGCCACTGTAAAAATGACCCCCTAACGCCAAC<br>TGTC AACGCCAACTAAAAAGTGACCCCCTTCCGTGCTA |
| ISPsy5  | IS66         | 35(13)              | 2059                     | 8    | Orf AB    | GTATCCGATCCACGAACCCACATTTCAAGCCACTGGC<br>GTAAGCGATCCACCAACCACACCTACCATCAGATGCGG   |
| ISPsy6  | unclassified | 14(1)               | 1603                     | 4(5) | Orf A     | CAGACTGTGTGAAAACCTAGCAATCTGCGCAGCGCTCA<br>CAGACTGTGTGAAAACACACTGATGAAGGCCCAAGCAA  |
| ISPsy7  | IS110        | 10                  | 1356                     | 0    | Orf A     | ATAATGAGATGGTCAGCCCGATCCGAGAAACCCGGAGT<br>TAGGCAAATGTATGGTCAGCCCACCTCCTGCAATCGCA  |
| ISPsy8  | IS3          | 5                   | 1432                     | 3    | Orf AB    | TGGACTGCCCCCAAGAAGTTGGACACCAATCCGACCTA<br>TGGACTGCCCCCGGAAGTTGGACAGTTTTAGCTTGCC   |
| ISPsy9  | IS3          | 1                   | 1452                     | 3    | Orf AB    | TGGTGTGACCCCCGAAGTTGGATGCAACCTTTGGAGG<br>TGGTGTGACCCCCGAAGTTGGACAATTATCCACCTAC    |
| ISPsy10 | IS5          | (3)                 | ND                       | ND   | Orf A     | ND<br>ND                                                                          |
| ISPsy11 | IS3          | 3                   | 1313                     | 3    | Orf AB    | TGTCCCGTCCTGAATAAGGTTTACACCTTCTGACCTTT                                            |

|              |     |    |    |        |                                                    |
|--------------|-----|----|----|--------|----------------------------------------------------|
| ISPsy12 IS3  | 1   | ND | ND | Orf AB | TGTCTAGTCCTGAAATAGGTTTACACCTGTTTCACGCT<br>ND<br>ND |
| ISPsy13 IS3  | 1   | ND | ND | Orf AB | ND<br>ND                                           |
| ISPsy14 IS21 | 1   | ND | ND | Orf AB | ND<br>ND                                           |
| ISPsy15 IS5  | (2) | ND | ND | Orf A  | ND<br>ND                                           |

---

<sup>a</sup> The number of full-length copies and the number of incomplete copies in parentheses.

<sup>b</sup> Size in base pairs of the element (length) and the direct repeat (DR) generated by insertion into the target site.

<sup>c</sup> ND = not determined.
