# Supplementary material
Source: PubMed Central journal article supplement (PMC193536)
Supplement: pnas_1731982100_8.pdf [file pnas_1731982100_8.pdf]

**Table 5. Phage and bacteriocin regions of *P. syringae* pv. *tomato* DC3000**

| Feature   | 5' end    | 3' end    | Size (bp) | Type of Feature                      |
|-----------|-----------|-----------|-----------|--------------------------------------|
| PYOCIN001 | 625,118   | 647,483   | 22,365    | Putative F-type pyocin               |
| PHAGE02   | 2,252,628 | 2,264,996 | 12,368    | Defective prophage region            |
| PHAGE03   | 3,824,683 | 3,865,352 | 40,669    | Putative P2-like integrated prophage |
| PHAGE04   | 4,445,530 | 4,453,456 | 7,926     | Defective prophage region            |
| PHAGE05   | 4,515,380 | 4,530,373 | 14,993    | Defective prophage region            |
| PHAGE06   | 4,543,843 | 4,563,492 | 19,649    | Putative lysogenic prophage region   |
