# Supplementary material
Source: PubMed Central journal article supplement (PMC193536)
Supplement: pnas_1731982100_9.pdf [file pnas_1731982100_9.pdf]

**Table 6. Genes with unknown function unique to DC3000 identified from the comparative analysis with the *P. aeruginosa* PAO1 and *P. putida* KT2440 genomes and the identification of putative homologs (BLASTP  $E < 10^{-5}$ ) in pathogenic bacteria**

| Locus     | Location | Clustering         |                   | Predicted product <sup>c</sup>               | GC%  | Length<br>(aa) | Plant<br>pathogens |     |     |    |    | Animal<br>pathogens |    |    |
|-----------|----------|--------------------|-------------------|----------------------------------------------|------|----------------|--------------------|-----|-----|----|----|---------------------|----|----|
|           |          | Genes <sup>a</sup> | TTSS <sup>b</sup> |                                              |      |                | Rs                 | Xcc | Xac | At | Xf | Yp                  | Ec | St |
| PSPTO0007 | C        | +                  | +                 | hypothetical protein                         | 55.2 | 294            |                    |     |     |    |    |                     |    |    |
| PSPTO0011 | C        | +                  | +                 | conserved hypothetical protein               | 55.9 | 236            | Rs                 | Xcc | Xac | At | Xf |                     |    |    |
| PSPTO0012 | C        | +                  | +                 | hypothetical protein                         | 54.9 | 167            |                    |     |     |    |    |                     |    |    |
| PSPTO0013 | C        | +                  | +                 | hypothetical protein                         | 58   | 189            |                    |     |     |    |    |                     |    |    |
| PSPTO0014 | C        | +                  | +                 | hypothetical protein                         | 66.3 | 96             |                    |     |     |    |    |                     |    |    |
| PSPTO0015 | C        | +                  | +                 | hypothetical protein                         | 55.7 | 203            |                    |     |     |    |    |                     |    |    |
| PSPTO0016 | C        | +                  | +                 | hypothetical protein                         | 53.5 | 155            |                    |     |     |    |    |                     |    |    |
| PSPTO0020 | C        | +                  | +                 | hypothetical protein                         | 54.9 | 116            |                    |     |     |    |    |                     |    |    |
| PSPTO0021 | C        | +                  | +                 | hypothetical protein                         | 51.2 | 746            |                    |     |     |    |    |                     |    |    |
| PSPTO0022 | C        | +                  | +                 | DNA-binding protein                          | 56.2 | 281            |                    |     |     |    |    |                     |    |    |
| PSPTO0023 | C        | +                  | +                 | hypothetical protein                         | 53.9 | 199            |                    |     |     |    |    |                     |    |    |
| PSPTO0024 | C        | +                  | +                 | hypothetical protein                         | 60   | 45             |                    |     |     |    |    |                     |    |    |
| PSPTO0025 | C        | +                  | +                 | hydrolase, haloacid dehalogenase-like family | 56.6 | 209            |                    |     |     |    |    |                     |    |    |
| PSPTO0026 | C        | +                  | +                 | hypothetical protein                         | 53   | 348            |                    |     |     |    |    |                     |    |    |
| PSPTO0027 | C        | +                  | +                 | hypothetical protein                         | 51.7 | 240            |                    |     |     |    |    |                     |    |    |
| PSPTO0032 | C        | +                  | +                 | conserved hypothetical protein               | 48.9 | 322            |                    |     |     | At |    |                     |    |    |
| PSPTO0034 | C        | +                  | +                 | recombinase, putative                        | 50.3 | 518            | Rs                 |     |     | At |    |                     |    |    |
| PSPTO0037 | C        | +                  | +                 | helicase domain protein                      | 53.4 | 1636           |                    |     |     |    |    | Yp                  |    |    |
| PSPTO0038 | C        | +                  | +                 | conserved domain protein                     | 53.4 | 696            |                    |     |     |    |    |                     |    |    |

|           |   |   |   |                                                   |      |     |    |  |  |    |  |  |  |  |
|-----------|---|---|---|---------------------------------------------------|------|-----|----|--|--|----|--|--|--|--|
| PSPTO0041 | C | + | + | hypothetical protein                              | 54.2 | 128 |    |  |  |    |  |  |  |  |
| PSPTO0043 | C | + | + | cytidine/deoxycytidylate deaminase family protein | 51.4 | 520 |    |  |  |    |  |  |  |  |
| PSPTO0045 | C | + | + | hypothetical protein                              | 53.2 | 52  |    |  |  |    |  |  |  |  |
| PSPTO0048 | C | + | + | hypothetical protein                              | 50   | 388 |    |  |  |    |  |  |  |  |
| PSPTO0049 | C | + | + | conserved hypothetical protein                    | 49.8 | 247 |    |  |  |    |  |  |  |  |
| PSPTO0050 | C | + | + | conserved hypothetical protein                    | 47.8 | 443 |    |  |  |    |  |  |  |  |
| PSPTO0051 | C | + | + | conserved hypothetical protein                    | 53.7 | 147 | Rs |  |  |    |  |  |  |  |
| PSPTO0052 | C | + | + | hypothetical protein                              | 53.1 | 589 |    |  |  |    |  |  |  |  |
| PSPTO0053 | C | + | + | hypothetical protein                              | 55.6 | 481 |    |  |  |    |  |  |  |  |
| PSPTO0054 | C | + | + | hypothetical protein                              | 57   | 203 |    |  |  |    |  |  |  |  |
| PSPTO0059 | C | + | + | hypothetical protein                              | 54.2 | 206 |    |  |  |    |  |  |  |  |
| PSPTO0088 | C |   |   | hypothetical protein                              | 58.3 | 44  |    |  |  |    |  |  |  |  |
| PSPTO0093 | C |   |   | hypothetical protein                              | 51.8 | 83  |    |  |  |    |  |  |  |  |
| PSPTO0104 | C |   |   | hypothetical protein                              | 53.9 | 34  |    |  |  |    |  |  |  |  |
| PSPTO0122 | C |   |   | hypothetical protein                              | 59.9 | 54  |    |  |  |    |  |  |  |  |
| PSPTO0133 | C |   |   | hypothetical protein                              | 54   | 50  |    |  |  |    |  |  |  |  |
| PSPTO0142 | C |   |   | hypothetical protein                              | 49.1 | 76  |    |  |  |    |  |  |  |  |
| PSPTO0149 | C |   |   | conserved hypothetical protein                    | 48.9 | 225 |    |  |  |    |  |  |  |  |
| PSPTO0160 | C |   |   | hypothetical protein                              | 60.3 | 125 |    |  |  |    |  |  |  |  |
| PSPTO0167 | C |   |   | hypothetical protein                              | 53.8 | 140 |    |  |  |    |  |  |  |  |
| PSPTO0172 | C |   |   | hypothetical protein                              | 54   | 97  |    |  |  |    |  |  |  |  |
| PSPTO0192 | C |   |   | recombinase, putative                             | 50.1 | 518 | Rs |  |  | At |  |  |  |  |
| PSPTO0205 | C | + |   | hypothetical protein                              | 48.4 | 331 |    |  |  |    |  |  |  |  |
| PSPTO0206 | C | + |   | conserved hypothetical protein                    | 55.3 | 158 |    |  |  |    |  |  |  |  |

|           |   |   |  |                                   |      |     |    |     |     |    |    |    |  |  |
|-----------|---|---|--|-----------------------------------|------|-----|----|-----|-----|----|----|----|--|--|
| PSPTO0208 | C | + |  | hypothetical protein              | 58   | 207 |    |     |     |    |    |    |  |  |
| PSPTO0216 | C | + |  | hypothetical protein              | 50.7 | 46  |    |     |     |    |    |    |  |  |
| PSPTO0240 | C | + |  | prevent-host-death family protein | 51.8 | 83  |    |     | Xac |    |    | Yp |  |  |
| PSPTO0242 | C | + |  | hypothetical protein              | 57.7 | 190 |    |     |     |    |    |    |  |  |
| PSPTO0243 | C | + |  | conserved hypothetical protein    | 49   | 273 |    |     |     |    |    |    |  |  |
| PSPTO0244 | C | + |  | hypothetical protein              | 62.3 | 237 |    |     |     | At |    |    |  |  |
| PSPTO0245 | C | + |  | acetyltransferase, GNAT family    | 62.5 | 285 |    |     |     | At |    |    |  |  |
| PSPTO0246 | C | + |  | hypothetical protein              | 54.7 | 137 |    |     |     |    |    |    |  |  |
| PSPTO0260 | C |   |  | conserved hypothetical protein    | 62.8 | 218 |    |     |     |    |    |    |  |  |
| PSPTO0274 | C | + |  | hypothetical protein              | 61.9 | 84  |    |     |     |    |    |    |  |  |
| PSPTO0275 | C | + |  | DNA-binding protein               | 56.1 | 377 | Rs | Xcc |     |    | Xf |    |  |  |
| PSPTO0277 | C | + |  | hypothetical protein              | 51.6 | 162 |    |     |     |    |    |    |  |  |
| PSPTO0279 | C | + |  | conserved hypothetical protein    | 54   | 118 |    |     |     |    |    |    |  |  |
| PSPTO0283 | C | + |  | hypothetical protein              | 54.4 | 147 |    |     |     |    |    |    |  |  |
| PSPTO0285 | C | + |  | conserved domain protein          | 53.3 | 360 |    |     |     |    |    |    |  |  |
| PSPTO0289 | C | + |  | hypothetical protein              | 56.2 | 51  |    |     |     |    |    |    |  |  |
| PSPTO0290 | C | + |  | conserved hypothetical protein    | 59.8 | 78  |    |     |     |    |    |    |  |  |
| PSPTO0293 | C | + |  | hypothetical protein              | 54.2 | 102 |    |     |     |    |    |    |  |  |
| PSPTO0294 | C | + |  | hypothetical protein              | 62.6 | 66  |    |     |     |    |    |    |  |  |
| PSPTO0295 | C | + |  | hypothetical protein              | 55.3 | 73  |    |     |     |    |    |    |  |  |
| PSPTO0296 | C | + |  | hypothetical protein              | 58.3 | 107 |    |     |     |    |    |    |  |  |
| PSPTO0297 | C | + |  | hypothetical protein              | 56.9 | 96  |    |     |     |    |    |    |  |  |
| PSPTO0302 | C | + |  | hypothetical protein              | 49.4 | 58  |    |     |     |    |    |    |  |  |
| PSPTO0331 | C |   |  | hypothetical protein              | 50.5 | 74  |    |     |     |    |    |    |  |  |

|           |   |   |   |                                |      |      |    |     |     |    |    |  |  |  |
|-----------|---|---|---|--------------------------------|------|------|----|-----|-----|----|----|--|--|--|
| PSPTO0332 | C |   |   | hypothetical protein           | 54.4 | 95   |    |     |     |    |    |  |  |  |
| PSPTO0342 | C |   |   | hypothetical protein           | 52.2 | 46   |    |     |     |    |    |  |  |  |
| PSPTO0354 | C |   |   | hypothetical protein           | 52.6 | 52   |    |     |     |    |    |  |  |  |
| PSPTO0368 | C |   |   | hypothetical protein           | 56.5 | 111  |    |     |     |    |    |  |  |  |
| PSPTO0374 | C |   |   | hypothetical protein           | 61.2 | 195  |    |     |     |    |    |  |  |  |
| PSPTO0391 | C |   |   | hypothetical protein           | 53.8 | 83   |    |     |     |    |    |  |  |  |
| PSPTO0392 | C |   |   | hypothetical protein           | 50.8 | 63   |    |     |     |    |    |  |  |  |
| PSPTO0442 | C |   |   | hypothetical protein           | 58.6 | 33   |    |     |     |    |    |  |  |  |
| PSPTO0447 | C |   |   | hypothetical protein           | 68.3 | 60   |    |     |     |    |    |  |  |  |
| PSPTO0467 | C | + | + | hypothetical protein           | 51.6 | 51   |    |     |     |    |    |  |  |  |
| PSPTO0473 | C | + | + | hypothetical protein           | 59.8 | 1073 |    | Xcc | Xac |    |    |  |  |  |
| PSPTO0475 | C | + | + | hypothetical protein           | 55.2 | 143  |    |     |     |    |    |  |  |  |
| PSPTO0476 | C | + | + | hypothetical protein           | 53.2 | 148  |    |     |     |    |    |  |  |  |
| PSPTO0477 | C | + | + | hypothetical protein           | 49.2 | 147  |    |     |     |    |    |  |  |  |
| PSPTO0478 | C | + | + | hypothetical protein           | 50.6 | 308  |    |     |     |    |    |  |  |  |
| PSPTO0482 | C | + | + | hypothetical protein           | 56.3 | 116  |    |     |     |    |    |  |  |  |
| PSPTO0521 | C | + | + | DNA-binding protein            | 63.8 | 94   |    |     |     |    |    |  |  |  |
| PSPTO0522 | C | + | + | conserved domain protein       | 58.5 | 408  | Rs | Xcc |     | At |    |  |  |  |
| PSPTO0526 | C | + | + | hypothetical protein           | 54.3 | 70   |    |     |     |    |    |  |  |  |
| PSPTO0527 | C | + | + | hypothetical protein           | 52.4 | 650  |    |     |     |    |    |  |  |  |
| PSPTO0528 | C | + | + | hypothetical protein           | 50.7 | 295  |    |     |     |    |    |  |  |  |
| PSPTO0529 | C | + | + | hypothetical protein           | 51   | 266  |    |     |     |    |    |  |  |  |
| PSPTO0530 | C | + | + | conserved hypothetical protein | 53.9 | 173  |    |     |     |    | Xf |  |  |  |
| PSPTO0561 | C |   |   | hypothetical protein           | 61.4 | 57   |    |     |     |    |    |  |  |  |

|           |   |   |   |                                |      |     |    |     |     |    |  |    |    |    |
|-----------|---|---|---|--------------------------------|------|-----|----|-----|-----|----|--|----|----|----|
| PSPTO0582 | C | + | + | hypothetical protein           | 51.2 | 213 |    |     |     |    |  |    |    |    |
| PSPTO0583 | C | + | + | hypothetical protein           | 47.2 | 229 |    |     |     |    |  |    |    |    |
| PSPTO0585 | C | + | + | hypothetical protein           | 50.5 | 155 |    |     |     |    |  |    |    |    |
| PSPTO0590 | C | + | + | hypothetical protein           | 45.4 | 47  |    |     |     |    |  |    |    |    |
| PSPTO0608 | C |   |   | hypothetical protein           | 30.3 | 33  |    |     |     |    |  |    |    |    |
| PSPTO0657 | C | + |   | hypothetical protein           | 55.1 | 196 |    |     |     |    |  |    |    |    |
| PSPTO0658 | C | + |   | hypothetical protein           | 49.7 | 181 |    |     |     |    |  |    |    |    |
| PSPTO0665 | C | + |   | ROK family protein             | 60.1 | 376 |    | Xcc | Xac | At |  | Yp | Ec | St |
| PSPTO0666 | C | + |   | hypothetical protein           | 53   | 173 |    |     |     |    |  |    |    |    |
| PSPTO0684 | C |   |   | hypothetical protein           | 56.3 | 183 |    |     |     |    |  |    |    |    |
| PSPTO0702 | C | + |   | conserved hypothetical protein | 56.8 | 339 | Rs |     | Xac |    |  |    | Ec | St |
| PSPTO0707 | C | + |   | hypothetical protein           | 56   | 204 |    |     |     |    |  |    |    |    |
| PSPTO0709 | C | + |   | hypothetical protein           | 54.9 | 240 |    |     |     |    |  |    |    |    |
| PSPTO0710 | C | + |   | conserved domain protein       | 56.1 | 98  |    |     |     |    |  |    |    |    |
| PSPTO0711 | C | + |   | hypothetical protein           | 54.5 | 591 |    |     |     |    |  |    |    |    |
| PSPTO0712 | C | + |   | hypothetical protein           | 52.4 | 201 |    |     |     |    |  |    |    |    |
| PSPTO0713 | C | + |   | conserved hypothetical protein | 55.3 | 347 |    |     |     |    |  |    |    |    |
| PSPTO0715 | C | + |   | conserved hypothetical protein | 58.5 | 265 | Rs |     |     |    |  |    |    |    |
| PSPTO0717 | C | + |   | DNA-binding protein            | 54.2 | 80  |    |     | Xac |    |  |    |    |    |
| PSPTO0718 | C | + |   | hypothetical protein           | 55.8 | 132 |    |     |     |    |  |    |    |    |
| PSPTO0719 | C | + |   | hypothetical protein           | 48.9 | 58  |    |     |     |    |  |    |    |    |
| PSPTO0745 | C |   |   | hypothetical protein           | 54.8 | 76  |    |     |     |    |  |    |    |    |
| PSPTO0746 | C |   |   | hypothetical protein           | 62.4 | 465 |    |     |     |    |  |    |    |    |
| PSPTO0792 | C |   |   | hypothetical protein           | 65.2 | 44  |    |     |     |    |  |    |    |    |

|           |   |   |   |                                        |      |     |    |     |     |    |    |    |    |  |
|-----------|---|---|---|----------------------------------------|------|-----|----|-----|-----|----|----|----|----|--|
| PSPTO0803 | C |   |   | hypothetical protein                   | 53.1 | 32  |    |     |     |    |    |    |    |  |
| PSPTO0819 | C |   |   | conserved hypothetical protein         | 58.3 | 248 | Rs | Xcc |     | At | Xf |    |    |  |
| PSPTO0831 | C | + | + | conserved hypothetical protein         | 56   | 642 |    | Xcc | Xac |    | Xf |    |    |  |
| PSPTO0837 | C | + | + | conserved hypothetical protein         | 44.2 | 200 |    |     | Xac |    |    |    |    |  |
| PSPTO0840 | C | + | + | hypothetical protein                   | 50.2 | 138 |    |     |     |    |    |    |    |  |
| PSPTO0847 | C | + | + | hypothetical protein                   | 50   | 122 |    |     |     |    |    |    |    |  |
| PSPTO0848 | C | + | + | conserved hypothetical protein         | 57.8 | 457 |    | Xcc | Xac |    |    |    |    |  |
| PSPTO0849 | C | + | + | conserved hypothetical protein         | 59.5 | 312 |    | Xcc | Xac |    |    |    |    |  |
| PSPTO0850 | C | + | + | conserved hypothetical protein         | 58.5 | 138 |    |     | Xac |    |    |    |    |  |
| PSPTO0851 | C | + | + | conserved hypothetical protein         | 51.6 | 162 |    |     |     |    |    | Yp | Ec |  |
| PSPTO0854 | C | + | + | hypothetical protein                   | 51.1 | 73  |    |     |     |    |    |    |    |  |
| PSPTO0856 | C | + | + | conserved hypothetical protein         | 52   | 272 |    |     |     |    |    |    |    |  |
| PSPTO0858 | C | + | + | hypothetical protein                   | 53.2 | 99  |    |     |     |    |    |    |    |  |
| PSPTO0859 | C | + | + | conserved hypothetical protein         | 56.1 | 889 |    |     | Xac |    |    |    |    |  |
| PSPTO0860 | C | + | + | conserved hypothetical protein         | 58.1 | 151 |    |     |     |    |    |    |    |  |
| PSPTO0861 | C | + | + | conserved hypothetical protein         | 58.2 | 498 |    |     | Xac |    |    |    |    |  |
| PSPTO0862 | C | + | + | conserved hypothetical protein         | 58.5 | 307 |    |     | Xac |    |    |    |    |  |
| PSPTO0863 | C | + | + | conserved hypothetical protein         | 59.6 | 222 |    |     |     |    |    |    |    |  |
| PSPTO0866 | C | + | + | hypothetical protein                   | 59.8 | 121 |    |     | Xac |    |    |    |    |  |
| PSPTO0867 | C | + | + | conserved hypothetical protein         | 59   | 122 |    |     | Xac |    |    |    |    |  |
| PSPTO0868 | C | + | + | hypothetical protein                   | 61.2 | 49  |    |     |     |    |    |    |    |  |
| PSPTO0870 | C | + | + | hypothetical protein                   | 49   | 66  |    |     |     |    |    |    |    |  |
| PSPTO0874 | C | + | + | nikkomycin biosynthesis domain protein | 49.2 | 417 |    |     |     |    |    |    |    |  |
| PSPTO0878 | C | + | + | conserved domain protein               | 59.4 | 105 |    |     |     |    |    |    |    |  |

|           |   |   |   |                                |      |     |    |     |     |    |  |    |    |    |
|-----------|---|---|---|--------------------------------|------|-----|----|-----|-----|----|--|----|----|----|
| PSPTO0880 | C | + | + | conserved hypothetical protein | 56.9 | 249 |    |     | Xac |    |  |    |    |    |
| PSPTO0881 | C | + | + | conserved domain protein       | 57.9 | 293 |    |     | Xac |    |  |    |    |    |
| PSPTO0882 | C | + | + | hypothetical protein           | 50.8 | 177 |    |     |     |    |  |    |    |    |
| PSPTO0891 | C |   | + | hypothetical protein           | 57   | 76  |    |     |     |    |  |    |    |    |
| PSPTO0895 | C | + | + | hypothetical protein           | 50.4 | 168 |    |     |     |    |  |    |    |    |
| PSPTO0899 | C | + | + | conserved domain protein       | 55.3 | 155 | Rs |     |     |    |  |    |    |    |
| PSPTO0900 | C | + | + | hypothetical protein           | 63.4 | 93  |    |     |     |    |  |    |    |    |
| PSPTO0904 | C | + | + | mutT/nudix family protein      | 51.9 | 504 |    |     |     |    |  |    |    |    |
| PSPTO0907 | C | + | + | hypothetical protein           | 53.1 | 403 |    |     |     |    |  |    |    |    |
| PSPTO0914 | C | + | + | STAS domain protein            | 63.9 | 96  |    | Xcc | Xac |    |  |    |    |    |
| PSPTO0918 | C | + | + | conserved hypothetical protein | 60   | 35  |    |     |     |    |  |    |    |    |
| PSPTO0921 | C | + | + | hypothetical protein           | 44.2 | 43  |    |     |     |    |  |    |    |    |
| PSPTO0930 | C | + |   | conserved hypothetical protein | 55.8 | 230 |    |     |     |    |  |    |    |    |
| PSPTO0931 | C | + |   | hypothetical protein           | 51.9 | 135 |    |     |     |    |  |    |    |    |
| PSPTO0932 | C | + |   | conserved hypothetical protein | 56.2 | 181 |    |     |     |    |  |    |    |    |
| PSPTO0933 | C | + |   | conserved hypothetical protein | 60.1 | 332 |    |     |     |    |  | Yp | Ec |    |
| PSPTO0935 | C | + |   | conserved hypothetical protein | 62.7 | 377 |    |     |     |    |  | Yp | Ec |    |
| PSPTO0936 | C | + |   | conserved hypothetical protein | 59.5 | 252 |    |     |     |    |  | Yp | Ec |    |
| PSPTO0937 | C | + |   | conserved hypothetical protein | 62.5 | 364 |    |     |     |    |  | Yp | Ec |    |
| PSPTO0938 | C | + |   | conserved hypothetical protein | 60.1 | 316 |    |     |     |    |  | Yp | Ec |    |
| PSPTO0966 | C |   |   | hypothetical protein           | 53.4 | 58  |    |     |     |    |  |    |    |    |
| PSPTO0974 | C |   |   | hypothetical protein           | 54.3 | 35  |    |     |     |    |  |    |    |    |
| PSPTO0987 | C |   |   | conserved domain protein       | 50.4 | 76  |    |     |     |    |  |    |    |    |
| PSPTO1003 | C |   |   | acetyltransferase, GNAT family | 58.2 | 145 |    |     |     | At |  |    |    | St |

|           |   |   |  |                                               |      |     |    |     |     |    |    |    |    |    |
|-----------|---|---|--|-----------------------------------------------|------|-----|----|-----|-----|----|----|----|----|----|
| PSPTO1006 | C |   |  | hypothetical protein                          | 57.6 | 33  |    |     |     |    |    |    |    |    |
| PSPTO1016 | C |   |  | hypothetical protein                          | 53.2 | 534 |    |     |     |    |    |    |    |    |
| PSPTO1036 | C | + |  | hypothetical protein                          | 47.7 | 153 |    |     |     |    |    |    |    |    |
| PSPTO1038 | C | + |  | conserved hypothetical protein                | 63.5 | 149 |    |     |     |    |    | Yp |    |    |
| PSPTO1044 | C | + |  | hypothetical protein                          | 55.9 | 59  |    |     |     |    |    |    |    |    |
| PSPTO1045 | C | + |  | PIN domain protein                            | 54.2 | 134 |    |     |     | At | Xf |    |    | St |
| PSPTO1046 | C | + |  | conserved hypothetical protein                | 52.2 | 76  |    |     |     |    |    |    |    | St |
| PSPTO1055 | C | + |  | hypothetical protein                          | 53.7 | 72  |    |     |     |    |    |    |    |    |
| PSPTO1057 | C | + |  | conserved hypothetical protein TIGR00305      | 56.4 | 136 |    |     |     |    | Xf |    |    |    |
| PSPTO1058 | C | + |  | conserved hypothetical protein                | 53.2 | 79  |    |     |     |    | Xf |    |    |    |
| PSPTO1060 | C | + |  | hypothetical protein                          | 52.5 | 47  |    |     |     |    |    |    |    |    |
| PSPTO1062 | C | + |  | hypothetical protein                          | 54   | 87  |    |     |     |    |    |    |    |    |
| PSPTO1082 | C |   |  | hypothetical protein                          | 54.2 | 72  |    |     |     |    |    |    |    |    |
| PSPTO1088 | C | + |  | conserved hypothetical protein                | 58.6 | 350 | Rs |     | Xac |    |    |    | Ec | St |
| PSPTO1090 | C | + |  | hypothetical protein                          | 38.1 | 325 |    |     |     |    |    |    |    |    |
| PSPTO1091 | C | + |  | conserved hypothetical protein                | 39.1 | 138 |    |     |     |    |    |    |    |    |
| PSPTO1093 | C | + |  | relaxase/mobilization nuclease domain protein | 52.8 | 805 |    |     |     |    |    |    |    |    |
| PSPTO1094 | C | + |  | conserved hypothetical protein                | 53.1 | 125 |    |     |     |    |    |    |    |    |
| PSPTO1113 | C |   |  | hypothetical protein                          | 54.1 | 194 |    |     |     |    |    |    |    |    |
| PSPTO1114 | C |   |  | hypothetical protein                          | 55.9 | 74  |    | Xcc | Xac |    |    |    |    |    |
| PSPTO1124 | C |   |  | hypothetical protein                          | 56.7 | 40  |    |     |     |    |    |    |    |    |
| PSPTO1125 | C |   |  | hypothetical protein                          | 58.7 | 71  |    |     |     |    |    |    |    |    |
| PSPTO1137 | C |   |  | hypothetical protein                          | 62   | 36  |    |     |     |    |    |    |    |    |
| PSPTO1142 | C |   |  | hypothetical protein                          | 60.5 | 86  |    | Xcc | Xac |    |    |    |    |    |

|           |   |   |   |                                     |      |     |    |     |     |  |  |    |  |    |
|-----------|---|---|---|-------------------------------------|------|-----|----|-----|-----|--|--|----|--|----|
| PSPTO1161 | C |   |   | hypothetical protein                | 60.4 | 64  |    |     |     |  |  |    |  |    |
| PSPTO1176 | C |   | + | conserved domain protein            | 51.8 | 114 |    |     |     |  |  |    |  |    |
| PSPTO1185 | C | + | + | hypothetical protein                | 56.2 | 201 |    |     |     |  |  |    |  |    |
| PSPTO1193 | C | + | + | conserved hypothetical protein      | 62.8 | 654 | Rs |     |     |  |  |    |  |    |
| PSPTO1195 | C | + | + | hypothetical protein                | 63.7 | 713 |    |     |     |  |  |    |  |    |
| PSPTO1198 | C | + | + | hypothetical protein                | 57.5 | 40  |    |     |     |  |  |    |  |    |
| PSPTO1199 | C |   |   | hypothetical protein                | 46.7 | 45  |    |     |     |  |  |    |  |    |
| PSPTO1259 | C |   |   | hypothetical protein                | 50.6 | 58  |    |     |     |  |  |    |  |    |
| PSPTO1297 | C |   |   | hypothetical protein                | 55.3 | 44  |    |     |     |  |  |    |  |    |
| PSPTO1311 | C | + |   | hypothetical protein                | 55.7 | 125 |    |     |     |  |  |    |  |    |
| PSPTO1319 | C | + |   | hypothetical protein                | 59.6 | 95  |    |     |     |  |  |    |  |    |
| PSPTO1321 | C | + |   | hypothetical protein                | 61.4 | 51  |    |     |     |  |  |    |  |    |
| PSPTO1322 | C | + |   | acetyltransferase, GNAT family      | 62.8 | 157 |    |     |     |  |  |    |  |    |
| PSPTO1341 | C | + |   | hypothetical protein                | 58   | 322 |    |     |     |  |  |    |  |    |
| PSPTO1342 | C | + |   | conserved domain protein            | 53.6 | 352 |    |     |     |  |  |    |  | St |
| PSPTO1344 | C | + |   | hypothetical protein                | 59.1 | 190 |    | Xcc | Xac |  |  |    |  |    |
| PSPTO1350 | C | + | + | hypothetical protein                | 61.4 | 400 |    |     |     |  |  |    |  |    |
| PSPTO1351 | C | + | + | hypothetical protein                | 55.8 | 98  |    |     |     |  |  |    |  |    |
| PSPTO1353 | C | + | + | conserved hypothetical protein      | 61.1 | 131 |    | Xcc | Xac |  |  | Yp |  |    |
| PSPTO1367 | C | + | + | acetyltransferase, GNAT family      | 53.4 | 148 |    |     |     |  |  |    |  |    |
| PSPTO1408 | C | + | + | hypothetical protein                | 64.5 | 61  |    |     |     |  |  |    |  |    |
| PSPTO1409 | C | + | + | conserved hypothetical protein      | 49.3 | 281 |    |     |     |  |  | Yp |  | St |
| PSPTO1410 | C | + | + | exchangeable effector locus protein | 53.6 | 138 |    |     |     |  |  |    |  |    |
| PSPTO1411 | C | + | + | hypothetical protein                | 49.6 | 191 |    |     |     |  |  |    |  |    |

|           |   |   |   |                                |      |     |    |     |     |    |    |    |    |  |
|-----------|---|---|---|--------------------------------|------|-----|----|-----|-----|----|----|----|----|--|
| PSPTO1442 | C |   |   | hypothetical protein           | 58.2 | 178 |    |     |     |    |    |    |    |  |
| PSPTO1451 | C |   |   | conserved hypothetical protein | 51.3 | 393 | Rs | Xcc |     |    |    | Yp | Ec |  |
| PSPTO1452 | C |   |   | hypothetical protein           | 57.9 | 38  |    |     |     |    |    |    |    |  |
| PSPTO1463 | C |   |   | hypothetical protein           | 57.6 | 48  |    |     |     |    |    |    |    |  |
| PSPTO1530 | C |   |   | hypothetical protein           | 54.6 | 282 |    |     |     |    |    |    |    |  |
| PSPTO1566 | C | + | + | hypothetical protein           | 62.5 | 32  |    |     |     |    |    |    |    |  |
| PSPTO1569 | C | + | + | conserved domain protein       | 50   | 88  |    |     |     |    |    |    |    |  |
| PSPTO1570 | C | + | + | hypothetical protein           | 56.2 | 51  |    |     |     |    |    |    |    |  |
| PSPTO1571 | C | + | + | hypothetical protein           | 52.6 | 523 |    |     |     |    |    |    |    |  |
| PSPTO1572 | C | + | + | hypothetical protein           | 47.4 | 104 |    |     |     |    |    |    |    |  |
| PSPTO1573 | C | + | + | conserved hypothetical protein | 52.8 | 60  |    |     |     |    | Xf |    | Ec |  |
| PSPTO1575 | C | + | + | hypothetical protein           | 56.6 | 103 |    |     |     |    |    |    |    |  |
| PSPTO1577 | C | + | + | hypothetical protein           | 56.9 | 370 |    |     | Xac |    |    |    |    |  |
| PSPTO1581 | C | + | + | conserved domain protein       | 55.2 | 212 | Rs |     |     |    | Xf |    |    |  |
| PSPTO1586 | C | + | + | hypothetical protein           | 56.1 | 123 |    |     |     |    |    |    |    |  |
| PSPTO1591 | C | + | + | hypothetical protein           | 51.7 | 40  |    |     |     |    |    |    |    |  |
| PSPTO1594 | C | + | + | conserved hypothetical protein | 63.9 | 134 | Rs |     |     | At |    |    |    |  |
| PSPTO1595 | C | + | + | hypothetical protein           | 57.8 | 225 |    |     |     |    |    |    |    |  |
| PSPTO1601 | C | + |   | hypothetical protein           | 59.6 | 166 |    |     |     |    |    |    |    |  |
| PSPTO1603 | C | + |   | hypothetical protein           | 58.1 | 39  |    |     |     |    |    |    |    |  |
| PSPTO1611 | C | + |   | hypothetical protein           | 65.8 | 37  |    |     |     |    |    |    |    |  |
| PSPTO1614 | C | + |   | hypothetical protein           | 56.6 | 179 |    |     |     |    |    |    |    |  |
| PSPTO1615 | C | + |   | hypothetical protein           | 48.7 | 290 |    |     |     |    |    |    |    |  |
| PSPTO1619 | C | + |   | hypothetical protein           | 54.9 | 226 |    |     |     |    |    |    |    |  |

|           |   |   |  |                                |      |     |  |     |  |  |  |    |    |  |
|-----------|---|---|--|--------------------------------|------|-----|--|-----|--|--|--|----|----|--|
| PSPTO1634 | C |   |  | conserved hypothetical protein | 50.6 | 60  |  |     |  |  |  | Yp |    |  |
| PSPTO1635 | C |   |  | conserved hypothetical protein | 53.5 | 134 |  |     |  |  |  | Yp |    |  |
| PSPTO1641 | C |   |  | hypothetical protein           | 57.7 | 93  |  |     |  |  |  |    |    |  |
| PSPTO1651 | C | + |  | conserved hypothetical protein | 58.7 | 96  |  |     |  |  |  |    | Ec |  |
| PSPTO1653 | C | + |  | conserved domain protein       | 53.4 | 517 |  | Xcc |  |  |  | Yp |    |  |
| PSPTO1654 | C | + |  | conserved hypothetical protein | 54.9 | 424 |  | Xcc |  |  |  | Yp |    |  |
| PSPTO1655 | C | + |  | hypothetical protein           | 51.7 | 158 |  |     |  |  |  |    |    |  |
| PSPTO1656 | C | + |  | conserved hypothetical protein | 53.5 | 629 |  |     |  |  |  |    | Ec |  |
| PSPTO1657 | C | + |  | hypothetical protein           | 51.4 | 556 |  |     |  |  |  |    |    |  |
| PSPTO1662 | C |   |  | hypothetical protein           | 55.9 | 65  |  |     |  |  |  |    |    |  |
| PSPTO1668 | C |   |  | hypothetical protein           | 57.3 | 82  |  |     |  |  |  |    |    |  |
| PSPTO1676 | C |   |  | conserved hypothetical protein | 53.1 | 157 |  |     |  |  |  |    |    |  |
| PSPTO1678 | C |   |  | hypothetical protein           | 58.9 | 116 |  |     |  |  |  |    |    |  |
| PSPTO1681 | C |   |  | hypothetical protein           | 54.3 | 94  |  |     |  |  |  |    |    |  |
| PSPTO1722 | C | + |  | hypothetical protein           | 63.7 | 101 |  |     |  |  |  |    |    |  |
| PSPTO1723 | C | + |  | hypothetical protein           | 48.2 | 47  |  |     |  |  |  |    |    |  |
| PSPTO1726 | C | + |  | hypothetical protein           | 50   | 104 |  |     |  |  |  |    |    |  |
| PSPTO1727 | C | + |  | hypothetical protein           | 59.3 | 50  |  |     |  |  |  |    |    |  |
| PSPTO1761 | C |   |  | hypothetical protein           | 54.9 | 68  |  |     |  |  |  |    |    |  |
| PSPTO1774 | C |   |  | hypothetical protein           | 57.6 | 59  |  |     |  |  |  |    |    |  |
| PSPTO1804 | C |   |  | hypothetical protein           | 57.8 | 30  |  |     |  |  |  |    |    |  |
| PSPTO1816 | C |   |  | hypothetical protein           | 51   | 70  |  |     |  |  |  |    |    |  |
| PSPTO1820 | C |   |  | hypothetical protein           | 57.6 | 59  |  |     |  |  |  |    |    |  |
| PSPTO1837 | C |   |  | hypothetical protein           | 58.8 | 119 |  |     |  |  |  |    |    |  |

|           |   |   |  |                                   |      |     |    |     |     |    |    |  |    |    |
|-----------|---|---|--|-----------------------------------|------|-----|----|-----|-----|----|----|--|----|----|
| PSPTO1840 | C |   |  | hypothetical protein              | 50   | 52  |    |     |     |    |    |  |    |    |
| PSPTO1848 | C | + |  | hypothetical protein              | 53.2 | 77  |    |     |     |    |    |  |    |    |
| PSPTO1849 | C | + |  | hypothetical protein              | 49.5 | 171 |    |     |     |    |    |  |    |    |
| PSPTO1850 | C | + |  | hypothetical protein              | 54.8 | 532 |    | Xcc |     |    |    |  |    |    |
| PSPTO1851 | C | + |  | hypothetical protein              | 54.9 | 720 |    | Xcc |     |    |    |  |    |    |
| PSPTO1853 | C | + |  | hypothetical protein              | 50.5 | 35  |    |     |     |    |    |  |    |    |
| PSPTO1858 | C | + |  | conserved hypothetical protein    | 53.4 | 293 |    |     |     |    |    |  | Ec |    |
| PSPTO1869 | C | + |  | conserved hypothetical protein    | 60.8 | 96  |    |     | Xac |    |    |  |    |    |
| PSPTO1872 | C | + |  | hypothetical protein              | 57   | 31  |    |     |     |    |    |  |    |    |
| PSPTO1876 | C | + |  | hypothetical protein              | 60.2 | 67  |    |     |     |    |    |  |    |    |
| PSPTO1895 | C | + |  | conserved hypothetical protein    | 55.6 | 87  | Rs |     |     |    |    |  |    |    |
| PSPTO1897 | C | + |  | BNR/Asp-box repeat protein        | 61   | 432 |    | Xcc | Xac | At |    |  |    | St |
| PSPTO1900 | C | + |  | hypothetical protein              | 52.7 | 31  |    |     |     |    |    |  |    |    |
| PSPTO1903 | C | + |  | hypothetical protein              | 49.3 | 228 |    |     |     |    |    |  |    |    |
| PSPTO1905 | C | + |  | hypothetical protein              | 58.6 | 79  |    |     |     |    |    |  |    |    |
| PSPTO1913 | C |   |  | conserved hypothetical protein    | 53.7 | 98  |    |     |     |    |    |  |    |    |
| PSPTO1932 | C |   |  | hypothetical protein              | 56.4 | 52  |    |     |     |    |    |  |    |    |
| PSPTO1938 | C |   |  | hypothetical protein              | 61.7 | 47  |    |     |     |    |    |  |    |    |
| PSPTO1967 | C |   |  | hypothetical protein              | 53.1 | 59  |    |     |     |    |    |  |    |    |
| PSPTO1999 | C | + |  | PIN domain protein                | 58.4 | 150 | Rs |     | Xac | At | Xf |  |    |    |
| PSPTO2000 | C | + |  | prevent-host-death family protein | 57.8 | 83  |    |     |     |    |    |  |    |    |
| PSPTO2006 | C | + |  | hypothetical protein              | 55.4 | 157 |    |     |     |    |    |  |    |    |
| PSPTO2012 | C | + |  | hypothetical protein              | 52.8 | 178 |    |     |     |    |    |  |    |    |
| PSPTO2013 | C | + |  | hypothetical protein              | 53.5 | 220 |    |     |     |    |    |  |    |    |

|           |   |   |  |                                                   |      |     |  |     |     |  |  |    |  |  |
|-----------|---|---|--|---------------------------------------------------|------|-----|--|-----|-----|--|--|----|--|--|
| PSPTO2027 | C |   |  | hypothetical protein                              | 61.4 | 38  |  |     |     |  |  |    |  |  |
| PSPTO2058 | C | + |  | hypothetical protein                              | 52.7 | 62  |  |     |     |  |  |    |  |  |
| PSPTO2062 | C | + |  | conserved hypothetical protein                    | 56.9 | 123 |  |     |     |  |  |    |  |  |
| PSPTO2067 | C | + |  | hypothetical protein                              | 58.1 | 39  |  |     |     |  |  |    |  |  |
| PSPTO2068 | C | + |  | conserved hypothetical protein                    | 54.4 | 109 |  | Xcc | Xac |  |  |    |  |  |
| PSPTO2069 | C | + |  | hypothetical protein                              | 57.9 | 61  |  |     |     |  |  |    |  |  |
| PSPTO2073 | C | + |  | hypothetical protein                              | 54   | 182 |  |     |     |  |  |    |  |  |
| PSPTO2074 | C | + |  | hypothetical protein                              | 54.3 | 97  |  |     |     |  |  |    |  |  |
| PSPTO2076 | C | + |  | hypothetical protein                              | 46.6 | 153 |  |     |     |  |  |    |  |  |
| PSPTO2077 | C | + |  | conserved domain protein                          | 59.5 | 121 |  |     |     |  |  |    |  |  |
| PSPTO2078 | C | + |  | hypothetical protein                              | 57.3 | 125 |  |     |     |  |  |    |  |  |
| PSPTO2079 | C | + |  | hypothetical protein                              | 57.8 | 120 |  |     |     |  |  |    |  |  |
| PSPTO2080 | C | + |  | conserved hypothetical protein, internal deletion | 56.3 | 126 |  |     |     |  |  | Yp |  |  |
| PSPTO2081 | C | + |  | hypothetical protein                              | 61.6 | 150 |  |     |     |  |  |    |  |  |
| PSPTO2083 | C | + |  | hypothetical protein                              | 47.4 | 175 |  |     |     |  |  |    |  |  |
| PSPTO2084 | C | + |  | conserved hypothetical protein                    | 58.6 | 83  |  |     |     |  |  |    |  |  |
| PSPTO2085 | C | + |  | conserved hypothetical protein                    | 59.5 | 131 |  |     |     |  |  |    |  |  |
| PSPTO2086 | C | + |  | hypothetical protein                              | 61.1 | 60  |  |     |     |  |  |    |  |  |
| PSPTO2087 | C | + |  | hypothetical protein                              | 62.4 | 102 |  |     |     |  |  |    |  |  |
| PSPTO2088 | C | + |  | conserved hypothetical protein                    | 60.9 | 132 |  |     |     |  |  |    |  |  |
| PSPTO2090 | C | + |  | hypothetical protein                              | 49.5 | 122 |  |     |     |  |  |    |  |  |
| PSPTO2095 | C | + |  | conserved domain protein                          | 56.7 | 70  |  |     |     |  |  |    |  |  |
| PSPTO2096 | C | + |  | hypothetical protein                              | 60.5 | 414 |  |     |     |  |  |    |  |  |
| PSPTO2122 | C |   |  | hypothetical protein                              | 57.4 | 97  |  |     |     |  |  |    |  |  |

|           |   |   |  |                                |      |     |  |  |     |  |  |    |  |  |
|-----------|---|---|--|--------------------------------|------|-----|--|--|-----|--|--|----|--|--|
| PSPTO2124 | C |   |  | hypothetical protein           | 54.5 | 85  |  |  |     |  |  |    |  |  |
| PSPTO2157 | C |   |  | hypothetical protein           | 64.4 | 568 |  |  |     |  |  |    |  |  |
| PSPTO2162 | C |   |  | hypothetical protein           | 55.5 | 164 |  |  |     |  |  |    |  |  |
| PSPTO2219 | C |   |  | hypothetical protein           | 56.8 | 54  |  |  |     |  |  |    |  |  |
| PSPTO2260 | C | + |  | conserved hypothetical protein | 59.8 | 409 |  |  |     |  |  |    |  |  |
| PSPTO2262 | C | + |  | hypothetical protein           | 52.9 | 347 |  |  |     |  |  |    |  |  |
| PSPTO2263 | C | + |  | hypothetical protein           | 53.8 | 145 |  |  |     |  |  |    |  |  |
| PSPTO2264 | C | + |  | hypothetical protein           | 59   | 109 |  |  |     |  |  |    |  |  |
| PSPTO2271 | C | + |  | hypothetical protein           | 58.6 | 37  |  |  |     |  |  |    |  |  |
| PSPTO2273 | C | + |  | hypothetical protein           | 51.5 | 57  |  |  |     |  |  |    |  |  |
| PSPTO2308 | C |   |  | hypothetical protein           | 55.4 | 65  |  |  |     |  |  |    |  |  |
| PSPTO2318 | C |   |  | hypothetical protein           | 46.5 | 104 |  |  |     |  |  |    |  |  |
| PSPTO2323 | C |   |  | hypothetical protein           | 51.3 | 596 |  |  |     |  |  |    |  |  |
| PSPTO2325 | C |   |  | hypothetical protein           | 46.9 | 86  |  |  |     |  |  |    |  |  |
| PSPTO2332 | C |   |  | hypothetical protein           | 61.1 | 155 |  |  |     |  |  |    |  |  |
| PSPTO2356 | C | + |  | hypothetical protein           | 55.6 | 127 |  |  |     |  |  |    |  |  |
| PSPTO2357 | C | + |  | hypothetical protein           | 58.6 | 141 |  |  |     |  |  |    |  |  |
| PSPTO2360 | C | + |  | hypothetical protein           | 56.2 | 89  |  |  |     |  |  |    |  |  |
| PSPTO2361 | C | + |  | conserved domain protein       | 61.8 | 76  |  |  | Xac |  |  | Yp |  |  |
| PSPTO2363 | C | + |  | hypothetical protein           | 54.4 | 79  |  |  |     |  |  |    |  |  |
| PSPTO2377 | C |   |  | hypothetical protein           | 59.7 | 101 |  |  |     |  |  |    |  |  |
| PSPTO2389 | C | + |  | hypothetical protein           | 57.1 | 260 |  |  |     |  |  |    |  |  |
| PSPTO2390 | C | + |  | hypothetical protein           | 46.1 | 256 |  |  |     |  |  |    |  |  |
| PSPTO2391 | C | + |  | hypothetical protein           | 55.7 | 106 |  |  |     |  |  |    |  |  |

|           |   |   |  |                                |      |     |    |     |  |    |    |    |  |  |
|-----------|---|---|--|--------------------------------|------|-----|----|-----|--|----|----|----|--|--|
| PSPTO2394 | C | + |  | radical SAM domain protein     | 46.3 | 306 |    |     |  |    |    |    |  |  |
| PSPTO2407 | C |   |  | conserved hypothetical protein | 58.3 | 214 | Rs | Xcc |  | At | Xf |    |  |  |
| PSPTO2431 | C |   |  | conserved hypothetical protein | 43.5 | 305 |    |     |  |    |    |    |  |  |
| PSPTO2433 | C |   |  | hypothetical protein           | 45.7 | 43  |    |     |  |    |    |    |  |  |
| PSPTO2442 | C |   |  | CheW domain protein            | 63.3 | 487 |    |     |  |    |    | Yp |  |  |
| PSPTO2443 | C |   |  | hypothetical protein           | 54.5 | 41  |    |     |  |    |    |    |  |  |
| PSPTO2455 | C |   |  | hypothetical protein           | 57.3 | 78  |    |     |  |    |    |    |  |  |
| PSPTO2456 | C |   |  | hypothetical protein           | 56.1 | 38  |    |     |  |    |    |    |  |  |
| PSPTO2497 | C | + |  | hypothetical protein           | 50.4 | 41  |    |     |  |    |    |    |  |  |
| PSPTO2498 | C | + |  | hypothetical protein           | 65.8 | 40  |    |     |  |    |    |    |  |  |
| PSPTO2501 | C | + |  | hypothetical protein           | 58.1 | 89  |    |     |  |    |    |    |  |  |
| PSPTO2502 | C | + |  | hypothetical protein           | 60.2 | 67  |    |     |  |    |    |    |  |  |
| PSPTO2503 | C | + |  | hypothetical protein           | 58.7 | 189 |    |     |  |    |    |    |  |  |
| PSPTO2512 | C |   |  | hypothetical protein           | 53.2 | 173 |    |     |  |    |    |    |  |  |
| PSPTO2513 | C |   |  | hypothetical protein           | 54.3 | 35  |    |     |  |    |    |    |  |  |
| PSPTO2530 | C | + |  | hypothetical protein           | 54.8 | 42  |    |     |  |    |    |    |  |  |
| PSPTO2531 | C | + |  | hypothetical protein           | 57.1 | 94  |    |     |  |    |    |    |  |  |
| PSPTO2534 | C | + |  | hypothetical protein           | 49.6 | 226 |    |     |  |    |    |    |  |  |
| PSPTO2536 | C | + |  | hypothetical protein           | 56   | 147 |    |     |  |    |    |    |  |  |
| PSPTO2537 | C | + |  | conserved domain protein       | 52.5 | 155 |    |     |  |    |    |    |  |  |
| PSPTO2584 | C | + |  | conserved hypothetical protein | 61.1 | 227 |    |     |  | At |    |    |  |  |
| PSPTO2587 | C | + |  | hypothetical protein           | 52.5 | 40  |    |     |  |    |    |    |  |  |
| PSPTO2589 | C | + |  | hypothetical protein           | 58.9 | 111 |    |     |  |    |    |    |  |  |
| PSPTO2613 | C | + |  | hypothetical protein           | 54.8 | 191 |    |     |  |    |    |    |  |  |

|           |   |   |   |                                |      |     |    |     |     |    |  |    |    |    |
|-----------|---|---|---|--------------------------------|------|-----|----|-----|-----|----|--|----|----|----|
| PSPTO2615 | C | + |   | GAF domain protein             | 54.3 | 165 |    | Xcc | Xac | At |  |    |    |    |
| PSPTO2619 | C | + |   | hypothetical protein           | 60.6 | 218 |    |     |     |    |  |    |    |    |
| PSPTO2631 | C |   |   | hypothetical protein           | 59.6 | 197 |    |     |     |    |  |    |    |    |
| PSPTO2647 | C |   |   | hypothetical protein           | 57   | 246 |    |     |     |    |  |    |    |    |
| PSPTO2648 | C |   |   | hypothetical protein           | 57   | 155 |    |     |     |    |  |    |    |    |
| PSPTO2669 | C | + | + | conserved hypothetical protein | 58.3 | 96  | Rs |     |     | At |  |    |    |    |
| PSPTO2675 | C | + | + | conserved hypothetical protein | 58.2 | 196 |    |     |     |    |  |    |    |    |
| PSPTO2679 | C | + | + | hypothetical protein           | 60.8 | 40  |    |     |     |    |  |    |    |    |
| PSPTO2682 | C | + | + | hypothetical protein           | 59.5 | 199 |    |     | Xac | At |  |    |    |    |
| PSPTO2695 | C | + | + | conserved hypothetical protein | 60.9 | 353 |    | Xcc | Xac |    |  |    |    |    |
| PSPTO2698 | C | + | + | hypothetical protein           | 59.6 | 104 |    |     |     |    |  |    |    |    |
| PSPTO2700 | C | + | + | hypothetical protein           | 56.9 | 184 |    |     |     |    |  |    |    |    |
| PSPTO2727 | C |   |   | hypothetical protein           | 49.5 | 31  |    |     |     |    |  |    |    |    |
| PSPTO2768 | C | + |   | hypothetical protein           | 50.6 | 58  |    |     |     |    |  |    |    |    |
| PSPTO2770 | C | + |   | hypothetical protein           | 60   | 35  |    |     |     |    |  |    |    |    |
| PSPTO2772 | C | + |   | hypothetical protein           | 55.1 | 141 |    |     |     |    |  |    |    |    |
| PSPTO2774 | C | + |   | conserved hypothetical protein | 57.5 | 131 |    |     |     |    |  | Yp |    |    |
| PSPTO2781 | C | + |   | conserved hypothetical protein | 62.8 | 411 | Rs |     |     | At |  |    |    |    |
| PSPTO2789 | C |   |   | hypothetical protein           | 43.1 | 48  |    |     |     |    |  |    |    |    |
| PSPTO2796 | C |   |   | conserved hypothetical protein | 60.2 | 283 |    |     |     | At |  |    |    |    |
| PSPTO2797 | C |   |   | hypothetical protein           | 63.1 | 56  |    |     |     |    |  |    |    |    |
| PSPTO2809 | C | + |   | conserved hypothetical protein | 64.6 | 486 | Rs | Xcc | Xac | At |  |    | Ec | St |
| PSPTO2815 | C | + |   | conserved hypothetical protein | 61.3 | 173 | Rs |     |     | At |  | Yp |    |    |
| PSPTO2817 | C | + |   | conserved domain protein       | 62.8 | 61  |    | Xcc | Xac | At |  | Yp |    |    |

|           |   |   |   |                                      |      |      |    |     |     |    |    |    |    |    |
|-----------|---|---|---|--------------------------------------|------|------|----|-----|-----|----|----|----|----|----|
| PSPTO2819 | C | + |   | conserved hypothetical protein       | 58.9 | 262  |    |     |     |    |    |    |    |    |
| PSPTO2820 | C | + |   | hypothetical protein                 | 63.8 | 371  |    |     |     |    |    |    |    |    |
| PSPTO2821 | C | + |   | hypothetical protein                 | 65.6 | 302  |    |     |     |    |    |    |    |    |
| PSPTO2823 | C | + |   | hypothetical protein                 | 59.3 | 249  |    |     |     |    |    |    |    |    |
| PSPTO2824 | C | + |   | auxin-responsive GH3-related protein | 61.8 | 487  |    |     |     |    |    |    |    |    |
| PSPTO2826 | C | + |   | conserved domain protein             | 58.9 | 99   |    |     |     | At |    | Yp | Ec |    |
| PSPTO2827 | C | + |   | conserved domain protein             | 60.8 | 80   |    |     |     | At |    | Yp |    | St |
| PSPTO2835 | C |   |   | conserved domain protein             | 58.7 | 50   |    |     |     | At |    |    |    |    |
| PSPTO2858 | C | + | + | hypothetical protein                 | 51.7 | 118  |    |     |     |    |    |    |    |    |
| PSPTO2859 | C | + | + | conserved hypothetical protein       | 56.2 | 866  |    |     |     |    |    | Yp |    |    |
| PSPTO2860 | C | + | + | helicase domain protein              | 57.5 | 459  |    |     |     |    |    |    | Ec |    |
| PSPTO2866 | C | + | + | cupin family protein                 | 57.1 | 133  |    | Xcc | Xac | At |    | Yp |    |    |
| PSPTO2867 | C | + | + | TspO/MBR family protein              | 56.8 | 146  |    | Xcc | Xac | At |    |    |    |    |
| PSPTO2868 | C | + | + | conserved hypothetical protein       | 59.4 | 392  | Rs |     |     |    | Xf |    |    |    |
| PSPTO2869 | C | + | + | hypothetical protein                 | 43.3 | 40   |    |     |     |    |    |    |    |    |
| PSPTO2871 | C | + | + | conserved hypothetical protein       | 59.7 | 1044 |    |     |     |    |    | Yp |    | St |
| PSPTO2873 | C | + | + | conserved hypothetical protein       | 61.2 | 345  |    |     |     |    |    |    |    |    |
| PSPTO2880 | C | + | + | conserved hypothetical protein       | 61.6 | 423  |    |     |     |    |    |    |    |    |
| PSPTO2881 | C | + | + | hypothetical protein                 | 61.5 | 32   |    |     |     |    |    |    |    |    |
| PSPTO2888 | C | + | + | conserved domain protein             | 45.1 | 48   |    |     |     |    |    |    |    |    |
| PSPTO2889 | C | + | + | hypothetical protein                 | 55   | 37   |    |     |     |    |    |    |    |    |
| PSPTO2892 | C | + | + | hypothetical protein                 | 52.1 | 32   |    |     |     |    |    |    |    |    |
| PSPTO2894 | C | + | + | lectin repeat domain protein         | 50   | 801  |    |     |     |    |    |    |    |    |
| PSPTO2895 | C | + | + | hypothetical protein                 | 57.1 | 339  |    |     |     | At |    |    |    |    |

|           |   |   |   |                                |      |     |    |     |     |    |    |    |    |    |
|-----------|---|---|---|--------------------------------|------|-----|----|-----|-----|----|----|----|----|----|
| PSPTO2897 | C | + | + | conserved hypothetical protein | 58.9 | 380 |    | Xcc | Xac |    |    |    |    |    |
| PSPTO2899 | C | + | + | conserved hypothetical protein | 59.1 | 394 |    | Xcc | Xac |    |    |    |    |    |
| PSPTO2908 | C | + |   | hypothetical protein           | 56.8 | 230 |    |     |     |    |    |    |    |    |
| PSPTO2918 | C | + |   | conserved hypothetical protein | 61.2 | 135 | Rs | Xcc | Xac | At |    |    |    |    |
| PSPTO2924 | C | + |   | hypothetical protein           | 54.7 | 53  |    |     |     |    |    |    |    |    |
| PSPTO2929 | C | + |   | hypothetical protein           | 53.5 | 320 |    |     |     |    |    |    |    |    |
| PSPTO2931 | C | + |   | conserved hypothetical protein | 59.3 | 394 |    |     |     |    |    |    |    |    |
| PSPTO2939 | C | + |   | hypothetical protein           | 54.5 | 170 |    |     |     |    |    |    |    |    |
| PSPTO2942 | C | + |   | hypothetical protein           | 57.8 | 34  |    |     |     |    |    |    |    |    |
| PSPTO2959 | C | + |   | conserved hypothetical protein | 64.2 | 551 |    |     |     |    |    |    |    |    |
| PSPTO2963 | C | + |   | oxidoreductase, FAD-binding    | 65   | 379 | Rs | Xcc | Xac | At |    |    |    |    |
| PSPTO2965 | C | + |   | conserved hypothetical protein | 57.9 | 130 | Rs |     |     |    |    |    |    |    |
| PSPTO2977 | C | + |   | conserved hypothetical protein | 51.7 | 211 |    |     |     |    |    |    |    |    |
| PSPTO2979 | C | + |   | conserved hypothetical protein | 52.3 | 128 |    |     |     |    |    |    |    |    |
| PSPTO2982 | C | + |   | conserved hypothetical protein | 62.3 | 576 |    | Xcc |     | At |    |    |    |    |
| PSPTO2998 | C |   |   | conserved hypothetical protein | 58.7 | 142 | Rs | Xcc | Xac | At | Xf |    |    |    |
| PSPTO2999 | C |   |   | hypothetical protein           | 54.4 | 250 |    |     |     |    |    |    |    |    |
| PSPTO3016 | C |   |   | conserved hypothetical protein | 48.4 | 117 | Rs |     |     |    |    | Yp | Ec | St |
| PSPTO3018 | C |   |   | conserved hypothetical protein | 58.6 | 307 | Rs |     |     | At |    | Yp |    | St |
| PSPTO3026 | C |   |   | conserved hypothetical protein | 55.1 | 81  |    | Xcc |     |    |    |    |    |    |
| PSPTO3055 | C |   |   | hypothetical protein           | 54.4 | 49  |    |     |     |    |    |    |    |    |
| PSPTO3067 | C |   | + | hypothetical protein           | 59.1 | 230 |    |     |     |    |    |    |    |    |
| PSPTO3078 | C |   | + | conserved hypothetical protein | 52.9 | 128 |    |     |     |    |    |    |    |    |
| PSPTO3092 | C |   | + | conserved hypothetical protein | 60.1 | 278 |    | Xcc | Xac |    |    |    |    |    |



|           |   |   |  |                                |      |     |    |     |     |    |    |    |    |  |
|-----------|---|---|--|--------------------------------|------|-----|----|-----|-----|----|----|----|----|--|
| PSPTO3261 | C |   |  | hypothetical protein           | 58.3 | 84  |    |     |     |    |    |    |    |  |
| PSPTO3270 | C | + |  | conserved hypothetical protein | 55.7 | 94  |    |     |     |    |    |    |    |  |
| PSPTO3271 | C | + |  | hypothetical protein           | 60.3 | 110 |    |     |     |    |    |    |    |  |
| PSPTO3276 | C | + |  | hypothetical protein           | 44.4 | 39  |    |     |     |    |    |    |    |  |
| PSPTO3289 | C | + |  | hypothetical protein           | 54.6 | 72  |    |     |     |    |    |    |    |  |
| PSPTO3292 | C | + |  | hypothetical protein           | 53.1 | 404 | Rs |     |     |    |    |    |    |  |
| PSPTO3293 | C | + |  | hypothetical protein           | 57.2 | 416 |    |     |     |    |    |    |    |  |
| PSPTO3303 | C |   |  | hypothetical protein           | 55.4 | 62  |    |     |     |    |    |    |    |  |
| PSPTO3305 | C |   |  | hypothetical protein           | 54.2 | 280 |    |     |     |    |    |    |    |  |
| PSPTO3324 | C |   |  | hypothetical protein           | 50.5 | 35  |    |     |     |    |    |    |    |  |
| PSPTO3337 | C |   |  | hypothetical protein           | 53.2 | 195 |    |     |     |    |    |    |    |  |
| PSPTO3384 | C | + |  | hypothetical protein           | 52.9 | 68  |    |     |     |    |    |    |    |  |
| PSPTO3386 | C | + |  | hypothetical protein           | 50.4 | 784 |    |     |     | At |    |    |    |  |
| PSPTO3387 | C | + |  | conserved hypothetical protein | 41.6 | 109 |    |     |     |    |    |    | Ec |  |
| PSPTO3402 | C |   |  | hypothetical protein           | 62.7 | 92  |    |     |     |    |    |    |    |  |
| PSPTO3414 | C | + |  | hypothetical protein           | 61.1 | 48  |    |     |     |    |    |    |    |  |
| PSPTO3415 | C | + |  | conserved domain protein       | 57.6 | 128 |    |     |     |    |    |    |    |  |
| PSPTO3420 | C | + |  | hypothetical protein           | 56.8 | 199 | Rs |     |     |    |    |    |    |  |
| PSPTO3422 | C | + |  | hypothetical protein           | 55   | 191 |    |     |     |    |    |    |    |  |
| PSPTO3424 | C | + |  | hypothetical protein           | 54.6 | 124 |    |     |     |    |    |    |    |  |
| PSPTO3426 | C | + |  | hypothetical protein           | 53.3 | 140 |    |     |     |    |    |    |    |  |
| PSPTO3428 | C | + |  | conserved domain protein       | 55.7 | 152 | Rs |     |     |    |    |    |    |  |
| PSPTO3429 | C | + |  | DNA-binding protein, putative  | 53.8 | 80  | Rs |     | Xac |    | Xf | Yp | Ec |  |
| PSPTO3468 | C |   |  | conserved hypothetical protein | 65.2 | 467 |    | Xcc | Xac | At |    |    |    |  |

|           |   |   |  |                                |      |     |  |     |     |    |    |    |    |  |
|-----------|---|---|--|--------------------------------|------|-----|--|-----|-----|----|----|----|----|--|
| PSPTO3478 | C | + |  | hypothetical protein           | 53.2 | 79  |  | Xcc | Xac |    |    |    |    |  |
| PSPTO3481 | C | + |  | hypothetical protein           | 55.7 | 76  |  |     |     |    |    |    |    |  |
| PSPTO3483 | C | + |  | hypothetical protein           | 52.7 | 282 |  |     |     |    |    |    |    |  |
| PSPTO3486 | C | + |  | hypothetical protein           | 50.9 | 38  |  |     |     |    |    |    |    |  |
| PSPTO3491 | C | + |  | hypothetical protein           | 58.2 | 122 |  |     |     |    |    |    |    |  |
| PSPTO3509 | C |   |  | hypothetical protein           | 47.5 | 40  |  |     |     |    |    |    |    |  |
| PSPTO3518 | C |   |  | hypothetical protein           | 60.2 | 41  |  |     |     |    |    |    |    |  |
| PSPTO3525 | C |   |  | hypothetical protein           | 52.9 | 143 |  |     |     |    |    |    |    |  |
| PSPTO3542 | C | + |  | conserved hypothetical protein | 60.7 | 305 |  |     |     |    |    |    |    |  |
| PSPTO3544 | C | + |  | conserved hypothetical protein | 60.1 | 381 |  |     |     | At |    |    |    |  |
| PSPTO3546 | C | + |  | hypothetical protein           | 51.8 | 47  |  |     |     |    |    |    |    |  |
| PSPTO3560 | C | + |  | GDA1/CD39 family protein       | 50.7 | 402 |  |     |     |    |    |    |    |  |
| PSPTO3562 | C | + |  | hypothetical protein           | 60.6 | 33  |  |     |     |    |    |    |    |  |
| PSPTO3567 | C | + |  | hypothetical protein           | 60.4 | 466 |  |     |     |    |    |    |    |  |
| PSPTO3568 | C | + |  | hypothetical protein           | 53.7 | 41  |  |     |     |    |    |    |    |  |
| PSPTO3571 | C | + |  | hypothetical protein           | 57.9 | 38  |  |     |     |    |    |    |    |  |
| PSPTO3575 | C | + |  | hypothetical protein           | 53.6 | 173 |  |     |     |    |    |    |    |  |
| PSPTO3578 | C | + |  | hypothetical protein           | 53.3 | 162 |  |     |     |    |    |    |    |  |
| PSPTO3597 | C | + |  | conserved hypothetical protein | 63.2 | 402 |  |     |     |    |    | Yp | Ec |  |
| PSPTO3599 | C | + |  | conserved domain protein       | 58.5 | 274 |  |     |     |    |    | Yp | Ec |  |
| PSPTO3606 | C | + |  | hypothetical protein           | 47.4 | 52  |  |     |     |    |    |    |    |  |
| PSPTO3610 | C | + |  | hypothetical protein           | 47.4 | 559 |  |     |     |    |    |    |    |  |
| PSPTO3616 | C | + |  | hypothetical protein           | 45.1 | 328 |  | Xcc | Xac |    | Xf |    |    |  |
| PSPTO3622 | C |   |  | hypothetical protein           | 60.7 | 112 |  |     |     |    |    |    |    |  |

|           |   |   |  |                                                |      |     |    |     |     |    |  |    |    |    |
|-----------|---|---|--|------------------------------------------------|------|-----|----|-----|-----|----|--|----|----|----|
| PSPTO3623 | C |   |  | hypothetical protein                           | 60.3 | 121 |    |     |     |    |  |    |    |    |
| PSPTO3640 | C |   |  | conserved hypothetical protein                 | 63.1 | 378 | Rs |     |     | At |  |    |    |    |
| PSPTO3650 | C | + |  | hypothetical protein                           | 42.3 | 426 |    |     |     |    |  |    |    |    |
| PSPTO3654 | C | + |  | acetyltransferase, GNAT family                 | 59.3 | 162 |    |     |     |    |  |    |    |    |
| PSPTO3655 | C | + |  | conserved hypothetical protein                 | 60.7 | 388 | Rs |     |     | At |  |    |    |    |
| PSPTO3673 | C |   |  | hypothetical protein                           | 53.3 | 40  |    |     |     |    |  |    |    |    |
| PSPTO3682 | C | + |  | conserved hypothetical protein                 | 63.4 | 375 | Rs | Xcc | Xac |    |  |    |    |    |
| PSPTO3683 | C | + |  | hypothetical protein                           | 54.6 | 61  |    |     |     |    |  |    |    |    |
| PSPTO3684 | C | + |  | hypothetical protein                           | 54.6 | 133 |    |     |     |    |  |    |    |    |
| PSPTO3690 | C |   |  | conserved hypothetical protein                 | 48.7 | 286 |    |     | Xac |    |  |    |    |    |
| PSPTO3693 | C |   |  | hypothetical protein                           | 60.4 | 95  |    |     |     |    |  |    |    |    |
| PSPTO3697 | C |   |  | hypothetical protein                           | 61.4 | 38  |    |     |     |    |  |    |    |    |
| PSPTO3710 | C |   |  | acetyltransferase, GNAT family                 | 57.4 | 184 |    |     |     |    |  |    |    |    |
| PSPTO3728 | C |   |  | hypothetical protein                           | 56.1 | 38  |    |     |     |    |  |    |    |    |
| PSPTO3732 | C |   |  | hypothetical protein                           | 52.3 | 79  |    |     |     |    |  |    |    |    |
| PSPTO3736 | C |   |  | conserved hypothetical protein                 | 57   | 90  | Rs |     |     | At |  |    |    |    |
| PSPTO3754 | C |   |  | hypothetical protein                           | 50.7 | 297 |    |     |     |    |  |    |    |    |
| PSPTO3767 | C |   |  | hypothetical protein                           | 52.7 | 86  |    |     |     |    |  |    |    |    |
| PSPTO3775 | C | + |  | hypothetical protein                           | 59.9 | 94  |    |     |     |    |  |    |    |    |
| PSPTO3776 | C | + |  | hypothetical protein                           | 47.5 | 148 |    |     |     |    |  |    |    |    |
| PSPTO3780 | C | + |  | glutathionylspermidine synthase family protein | 58.2 | 385 |    | Xcc | Xac | At |  | Yp | Ec | St |
| PSPTO3781 | C | + |  | conserved hypothetical protein                 | 61.4 | 240 |    | Xcc | Xac |    |  |    | Ec |    |
| PSPTO3782 | C | + |  | conserved hypothetical protein                 | 59.3 | 135 | Rs | Xcc | Xac | At |  |    | Ec | St |
| PSPTO3783 | C | + |  | conserved hypothetical protein                 | 59.5 | 218 |    | Xcc | Xac |    |  |    | Ec | St |



|           |   |   |   |                                |      |     |  |  |  |  |  |  |  |  |
|-----------|---|---|---|--------------------------------|------|-----|--|--|--|--|--|--|--|--|
| PSPTO3948 | C | + |   | hypothetical protein           | 61.9 | 127 |  |  |  |  |  |  |  |  |
| PSPTO3961 | C | + |   | hypothetical protein           | 41.4 | 66  |  |  |  |  |  |  |  |  |
| PSPTO3962 | C | + |   | hypothetical protein           | 43.1 | 34  |  |  |  |  |  |  |  |  |
| PSPTO3965 | C | + |   | hypothetical protein           | 51.3 | 517 |  |  |  |  |  |  |  |  |
| PSPTO4003 | C | + | + | conserved hypothetical protein | 62.9 | 178 |  |  |  |  |  |  |  |  |
| PSPTO4004 | C | + | + | conserved hypothetical protein | 63.1 | 310 |  |  |  |  |  |  |  |  |
| PSPTO4005 | C | + | + | hypothetical protein           | 58.5 | 142 |  |  |  |  |  |  |  |  |
| PSPTO4007 | C | + | + | conserved hypothetical protein | 61.9 | 174 |  |  |  |  |  |  |  |  |
| PSPTO4008 | C | + | + | hypothetical protein           | 59.8 | 135 |  |  |  |  |  |  |  |  |
| PSPTO4011 | C | + | + | hypothetical protein           | 57.1 | 94  |  |  |  |  |  |  |  |  |
| PSPTO4012 | C | + | + | hypothetical protein           | 58.6 | 253 |  |  |  |  |  |  |  |  |
| PSPTO4015 | C | + | + | hypothetical protein           | 55.3 | 82  |  |  |  |  |  |  |  |  |
| PSPTO4016 | C | + | + | hypothetical protein           | 56.4 | 68  |  |  |  |  |  |  |  |  |
| PSPTO4017 | C | + | + | hypothetical protein           | 53.8 | 179 |  |  |  |  |  |  |  |  |
| PSPTO4028 | C |   |   | hypothetical protein           | 59.3 | 41  |  |  |  |  |  |  |  |  |
| PSPTO4035 | C | + |   | hypothetical protein           | 57.7 | 208 |  |  |  |  |  |  |  |  |
| PSPTO4040 | C | + |   | conserved domain protein       | 49.7 | 122 |  |  |  |  |  |  |  |  |
| PSPTO4042 | C | + |   | conserved hypothetical protein | 60.1 | 132 |  |  |  |  |  |  |  |  |
| PSPTO4043 | C | + |   | hypothetical protein           | 61.3 | 200 |  |  |  |  |  |  |  |  |
| PSPTO4044 | C | + |   | hypothetical protein           | 61.2 | 194 |  |  |  |  |  |  |  |  |
| PSPTO4045 | C | + |   | hypothetical protein           | 51.2 | 99  |  |  |  |  |  |  |  |  |
| PSPTO4047 | C | + |   | hypothetical protein           | 50.8 | 120 |  |  |  |  |  |  |  |  |
| PSPTO4048 | C | + |   | conserved hypothetical protein | 58.2 | 83  |  |  |  |  |  |  |  |  |
| PSPTO4049 | C | + |   | conserved hypothetical protein | 60.1 | 132 |  |  |  |  |  |  |  |  |

|           |   |   |   |                                                          |      |     |    |     |     |    |    |    |  |    |
|-----------|---|---|---|----------------------------------------------------------|------|-----|----|-----|-----|----|----|----|--|----|
| PSPTO4050 | C | + |   | hypothetical protein                                     | 62.1 | 250 |    |     |     |    |    |    |  |    |
| PSPTO4051 | C | + |   | hypothetical protein                                     | 59.9 | 191 |    |     |     |    |    |    |  |    |
| PSPTO4052 | C | + |   | hypothetical protein                                     | 56.8 | 288 |    |     |     |    |    |    |  |    |
| PSPTO4053 | C | + |   | hypothetical protein                                     | 54.2 | 32  |    |     |     |    |    |    |  |    |
| PSPTO4054 | C | + |   | hypothetical protein                                     | 59.5 | 270 |    |     |     |    |    |    |  |    |
| PSPTO4055 | C | + |   | hypothetical protein                                     | 58.3 | 64  |    |     |     |    |    |    |  |    |
| PSPTO4056 | C | + |   | hypothetical protein                                     | 53.2 | 195 |    |     |     |    |    |    |  |    |
| PSPTO4066 | C | + |   | conserved domain protein                                 | 52.6 | 97  |    |     |     |    |    |    |  |    |
| PSPTO4069 | C | + |   | hypothetical protein                                     | 46.9 | 54  |    |     |     |    |    |    |  |    |
| PSPTO4070 | C | + |   | conserved hypothetical protein                           | 50.3 | 145 |    |     |     |    |    | Yp |  |    |
| PSPTO4071 | C | + |   | conserved hypothetical protein                           | 57.4 | 191 |    |     | Xac |    |    |    |  |    |
| PSPTO4085 | C |   |   | hypothetical protein                                     | 61.7 | 54  |    |     |     |    |    |    |  |    |
| PSPTO4086 | C |   |   | hypothetical protein                                     | 61.1 | 54  |    |     |     |    |    |    |  |    |
| PSPTO4096 | C | + | + | conserved domain protein                                 | 56.5 | 46  |    |     |     |    |    |    |  | St |
| PSPTO4099 | C | + | + | hypothetical protein                                     | 57.8 | 49  |    |     |     |    |    |    |  |    |
| PSPTO4102 | C | + | + | hypothetical protein                                     | 54.9 | 65  |    |     |     |    |    |    |  |    |
| PSPTO4118 | C |   |   | hypothetical protein                                     | 44.7 | 38  |    |     |     |    |    |    |  |    |
| PSPTO4150 | C |   |   | hypothetical protein                                     | 56.7 | 120 |    |     |     |    |    |    |  |    |
| PSPTO4153 | C |   |   | hypothetical protein                                     | 57.3 | 132 |    |     |     |    |    |    |  |    |
| PSPTO4177 | C | + |   | 2-hydroxychromene-2-carboxylate isomerase family protein | 58.8 | 215 | Rs | Xcc | Xac | At | Xf |    |  |    |
| PSPTO4184 | C | + |   | hypothetical protein                                     | 61.1 | 66  |    |     |     |    |    |    |  |    |
| PSPTO4186 | C | + |   | hypothetical protein                                     | 43.5 | 226 |    |     |     |    |    |    |  |    |
| PSPTO4187 | C | + |   | hypothetical protein                                     | 47.8 | 217 |    |     |     |    |    |    |  |    |
| PSPTO4189 | C | + |   | hypothetical protein                                     | 43.4 | 229 |    |     |     |    |    |    |  |    |

|           |   |   |   |                                |      |     |    |     |     |    |    |  |  |  |
|-----------|---|---|---|--------------------------------|------|-----|----|-----|-----|----|----|--|--|--|
| PSPTO4190 | C | + |   | hypothetical protein           | 49.5 | 289 |    |     |     |    |    |  |  |  |
| PSPTO4197 | C | + |   | conserved hypothetical protein | 62.6 | 398 |    |     |     | At |    |  |  |  |
| PSPTO4199 | C | + |   | conserved hypothetical protein | 63.6 | 99  |    |     |     |    |    |  |  |  |
| PSPTO4207 | C | + |   | hypothetical protein           | 61.5 | 291 |    | Xcc | Xac |    |    |  |  |  |
| PSPTO4209 | C | + |   | hypothetical protein           | 58.9 | 223 |    | Xcc | Xac |    |    |  |  |  |
| PSPTO4241 | C |   |   | conserved hypothetical protein | 61.5 | 241 |    |     |     | At |    |  |  |  |
| PSPTO4242 | C |   |   | conserved hypothetical protein | 59.3 | 205 |    |     |     | At |    |  |  |  |
| PSPTO4250 | C |   |   | DNA-binding protein            | 53.2 | 378 |    |     |     |    |    |  |  |  |
| PSPTO4261 | C | + |   | isomerase, putative            | 50.4 | 232 | Rs | Xcc | Xac | At | Xf |  |  |  |
| PSPTO4264 | C | + |   | conserved hypothetical protein | 55.4 | 184 |    |     |     |    |    |  |  |  |
| PSPTO4272 | C | + |   | hypothetical protein           | 47.8 | 494 |    |     |     |    |    |  |  |  |
| PSPTO4282 | C | + |   | hypothetical protein           | 55.1 | 46  |    |     |     |    |    |  |  |  |
| PSPTO4284 | C | + |   | acetyltransferase, GNAT family | 60.1 | 148 |    |     |     |    |    |  |  |  |
| PSPTO4286 | C | + |   | conserved hypothetical protein | 57.1 | 406 | Rs |     |     |    |    |  |  |  |
| PSPTO4287 | C | + |   | hypothetical protein           | 52   | 336 |    |     |     |    |    |  |  |  |
| PSPTO4311 | C |   |   | hypothetical protein           | 53.6 | 74  |    |     |     |    |    |  |  |  |
| PSPTO4313 | C |   |   | hypothetical protein           | 61.4 | 69  |    |     |     |    |    |  |  |  |
| PSPTO4321 | C | + | + | hypothetical protein           | 55.1 | 330 |    |     |     |    |    |  |  |  |
| PSPTO4322 | C | + | + | hypothetical protein           | 52.6 | 606 |    |     |     |    |    |  |  |  |
| PSPTO4323 | C | + | + | conserved hypothetical protein | 53.2 | 159 |    |     |     |    |    |  |  |  |
| PSPTO4324 | C | + | + | hypothetical protein           | 54.4 | 98  |    |     |     |    |    |  |  |  |
| PSPTO4325 | C | + | + | hypothetical protein           | 54.5 | 502 |    |     |     |    |    |  |  |  |
| PSPTO4326 | C | + | + | conserved hypothetical protein | 52.4 | 313 |    |     | Xac |    |    |  |  |  |
| PSPTO4327 | C | + | + | hypothetical protein           | 51.4 | 109 |    |     |     |    |    |  |  |  |



|           |   |   |   |                                |      |     |    |     |     |    |  |  |  |  |
|-----------|---|---|---|--------------------------------|------|-----|----|-----|-----|----|--|--|--|--|
| PSPTO4607 | C | + | + | hypothetical protein           | 49   | 819 |    |     |     |    |  |  |  |  |
| PSPTO4609 | C | + | + | hypothetical protein           | 56   | 81  |    |     |     |    |  |  |  |  |
| PSPTO4614 | C | + | + | conserved hypothetical protein | 51.7 | 200 |    |     |     |    |  |  |  |  |
| PSPTO4617 | C | + | + | hypothetical protein           | 51.3 | 80  |    |     |     |    |  |  |  |  |
| PSPTO4618 | C | + | + | hypothetical protein           | 54.5 | 107 |    |     |     |    |  |  |  |  |
| PSPTO4620 | C | + | + | conserved hypothetical protein | 49.2 | 107 |    |     |     |    |  |  |  |  |
| PSPTO4627 | C | + | + | hypothetical protein           | 48.3 | 817 |    |     |     |    |  |  |  |  |
| PSPTO4628 | C | + | + | hypothetical protein           | 55.4 | 68  |    |     |     |    |  |  |  |  |
| PSPTO4629 | C | + |   | hypothetical protein           | 54.3 | 35  |    |     |     |    |  |  |  |  |
| PSPTO4649 | C |   |   | hypothetical protein           | 49.7 | 57  |    |     |     |    |  |  |  |  |
| PSPTO4655 | C |   |   | hypothetical protein           | 62.1 | 289 |    |     |     |    |  |  |  |  |
| PSPTO4658 | C |   |   | conserved domain protein       | 58.4 | 329 | Rs |     |     |    |  |  |  |  |
| PSPTO4670 | C | + |   | hypothetical protein           | 54.7 | 265 |    | Xcc | Xac |    |  |  |  |  |
| PSPTO4672 | C | + |   | hypothetical protein           | 57.9 | 57  |    |     |     |    |  |  |  |  |
| PSPTO4674 | C | + |   | hypothetical protein           | 51.7 | 58  |    |     |     |    |  |  |  |  |
| PSPTO4676 | C | + |   | hypothetical protein           | 56   | 69  |    |     |     |    |  |  |  |  |
| PSPTO4677 | C | + |   | hypothetical protein           | 57   | 213 |    |     |     |    |  |  |  |  |
| PSPTO4688 | C |   | + | hypothetical protein           | 65.1 | 147 |    |     |     |    |  |  |  |  |
| PSPTO4716 | C | + | + | hypothetical protein           | 54.7 | 165 |    |     |     |    |  |  |  |  |
| PSPTO4717 | C | + | + | hypothetical protein           | 59.6 | 89  |    |     |     |    |  |  |  |  |
| PSPTO4719 | C | + | + | hypothetical protein           | 60   | 55  |    |     |     |    |  |  |  |  |
| PSPTO4723 | C | + | + | conserved hypothetical protein | 48.4 | 102 | Rs |     |     | At |  |  |  |  |
| PSPTO4733 | C | + | + | hypothetical protein           | 44.9 | 179 |    |     |     |    |  |  |  |  |
| PSPTO4734 | C | + | + | conserved domain protein       | 58.7 | 75  |    |     |     |    |  |  |  |  |

|           |   |   |   |                                             |      |     |  |  |  |  |  |    |    |  |
|-----------|---|---|---|---------------------------------------------|------|-----|--|--|--|--|--|----|----|--|
| PSPTO4741 | C | + | + | hypothetical protein                        | 45   | 140 |  |  |  |  |  |    |    |  |
| PSPTO4743 | C | + | + | hypothetical protein                        | 44   | 633 |  |  |  |  |  |    |    |  |
| PSPTO4747 | C | + | + | hypothetical protein                        | 53   | 212 |  |  |  |  |  |    |    |  |
| PSPTO4750 | C | + | + | hypothetical protein                        | 54.7 | 159 |  |  |  |  |  |    |    |  |
| PSPTO4752 | C | + | + | hypothetical protein                        | 56.1 | 321 |  |  |  |  |  |    |    |  |
| PSPTO4753 | C | + | + | hypothetical protein                        | 56.2 | 363 |  |  |  |  |  |    |    |  |
| PSPTO4754 | C | + | + | hypothetical protein                        | 51.4 | 281 |  |  |  |  |  |    |    |  |
| PSPTO4756 | C | + | + | hypothetical protein                        | 53.8 | 44  |  |  |  |  |  |    |    |  |
| PSPTO4757 | C | + | + | hypothetical protein                        | 55.3 | 73  |  |  |  |  |  |    |    |  |
| PSPTO4758 | C | + | + | hypothetical protein                        | 51.5 | 44  |  |  |  |  |  |    |    |  |
| PSPTO4761 | C | + | + | hypothetical protein                        | 51.4 | 673 |  |  |  |  |  |    | Ec |  |
| PSPTO4762 | C | + | + | von Willebrand factor type A domain protein | 52.8 | 224 |  |  |  |  |  | Yp | Ec |  |
| PSPTO4763 | C | + | + | hypothetical protein                        | 55   | 260 |  |  |  |  |  |    | Ec |  |
| PSPTO4766 | C | + | + | hypothetical protein                        | 54.6 | 102 |  |  |  |  |  |    |    |  |
| PSPTO4767 | C | + | + | pentapeptide repeat protein                 | 45.4 | 327 |  |  |  |  |  |    |    |  |
| PSPTO4772 | C | + | + | hypothetical protein                        | 50.8 | 346 |  |  |  |  |  |    |    |  |
| PSPTO4780 | C | + | + | hypothetical protein                        | 59.2 | 179 |  |  |  |  |  |    |    |  |
| PSPTO4783 | C | + | + | hypothetical protein                        | 55.8 | 49  |  |  |  |  |  |    |    |  |
| PSPTO4785 | C | + | + | hypothetical protein                        | 51.9 | 36  |  |  |  |  |  |    |    |  |
| PSPTO4797 | C |   |   | hypothetical protein                        | 50   | 72  |  |  |  |  |  |    |    |  |
| PSPTO4801 | C |   |   | hypothetical protein                        | 45.8 | 51  |  |  |  |  |  |    |    |  |
| PSPTO4811 | C |   |   | hypothetical protein                        | 59   | 39  |  |  |  |  |  |    |    |  |
| PSPTO4815 | C |   |   | hypothetical protein                        | 51.5 | 68  |  |  |  |  |  |    |    |  |
| PSPTO4838 | C |   |   | hypothetical protein                        | 55.1 | 49  |  |  |  |  |  |    |    |  |

|           |   |   |  |                                |      |     |    |     |     |  |    |  |    |    |
|-----------|---|---|--|--------------------------------|------|-----|----|-----|-----|--|----|--|----|----|
| PSPTO4870 | C | + |  | hypothetical protein           | 55   | 211 |    |     |     |  |    |  |    |    |
| PSPTO4871 | C | + |  | hypothetical protein           | 55   | 211 |    |     |     |  |    |  |    |    |
| PSPTO4872 | C | + |  | hypothetical protein           | 57.3 | 232 |    |     |     |  |    |  |    |    |
| PSPTO4884 | C |   |  | hypothetical protein           | 57   | 768 |    |     |     |  |    |  |    |    |
| PSPTO4902 | C |   |  | hypothetical protein           | 55.8 | 77  |    |     |     |  |    |  |    |    |
| PSPTO4927 | C |   |  | hypothetical protein           | 54.3 | 914 |    |     |     |  |    |  |    |    |
| PSPTO4966 | C | + |  | hypothetical protein           | 52.9 | 128 |    |     |     |  |    |  |    |    |
| PSPTO4967 | C | + |  | hypothetical protein           | 44.4 | 220 |    |     |     |  |    |  |    |    |
| PSPTO4968 | C | + |  | hypothetical protein           | 54.6 | 213 |    |     |     |  |    |  |    |    |
| PSPTO5025 | C |   |  | hypothetical protein           | 43.6 | 123 |    |     |     |  |    |  |    |    |
| PSPTO5026 | C |   |  | hypothetical protein           | 55.6 | 36  |    |     |     |  |    |  |    |    |
| PSPTO5042 | C |   |  | hypothetical protein           | 65.2 | 46  |    |     |     |  |    |  |    |    |
| PSPTO5059 | C |   |  | hypothetical protein           | 56.6 | 189 |    |     |     |  |    |  |    |    |
| PSPTO5073 | C |   |  | hypothetical protein           | 49.4 | 79  |    |     |     |  |    |  |    |    |
| PSPTO5088 | C |   |  | hypothetical protein           | 52.5 | 33  |    |     |     |  |    |  |    |    |
| PSPTO5091 | C | + |  | conserved hypothetical protein | 60.1 | 239 | Rs | Xcc | Xac |  |    |  | Ec |    |
| PSPTO5098 | C | + |  | conserved hypothetical protein | 63.9 | 315 | Rs | Xcc | Xac |  | Xf |  | Ec |    |
| PSPTO5101 | C | + |  | conserved hypothetical protein | 59.8 | 204 | Rs | Xcc | Xac |  |    |  | Ec |    |
| PSPTO5108 | C | + |  | conserved hypothetical protein | 62.9 | 151 | Rs | Xcc | Xac |  |    |  | Ec |    |
| PSPTO5113 | C | + |  | conserved hypothetical protein | 52.6 | 422 |    |     |     |  |    |  |    | St |
| PSPTO5114 | C | + |  | conserved domain protein       | 53   | 214 |    |     |     |  |    |  |    |    |
| PSPTO5122 | C |   |  | hypothetical protein           | 52.1 | 32  |    |     |     |  |    |  |    |    |
| PSPTO5124 | C |   |  | hypothetical protein           | 56.3 | 32  |    |     |     |  |    |  |    |    |
| PSPTO5183 | C |   |  | hypothetical protein           | 59.7 | 239 |    |     |     |  |    |  |    |    |

|           |   |   |   |                                   |      |     |  |  |  |  |  |    |  |  |
|-----------|---|---|---|-----------------------------------|------|-----|--|--|--|--|--|----|--|--|
| PSPTO5199 | C | + |   | hypothetical protein              | 56.8 | 54  |  |  |  |  |  |    |  |  |
| PSPTO5202 | C | + |   | hypothetical protein              | 53.1 | 332 |  |  |  |  |  |    |  |  |
| PSPTO5203 | C | + |   | hypothetical protein              | 52.6 | 359 |  |  |  |  |  | Yp |  |  |
| PSPTO5205 | C | + |   | hypothetical protein              | 51.9 | 77  |  |  |  |  |  |    |  |  |
| PSPTO5206 | C | + |   | EF hand domain protein            | 45.4 | 310 |  |  |  |  |  |    |  |  |
| PSPTO5209 | C | + |   | hypothetical protein              | 45.2 | 392 |  |  |  |  |  |    |  |  |
| PSPTO5210 | C | + |   | EF hand domain protein            | 44.3 | 310 |  |  |  |  |  |    |  |  |
| PSPTO5234 | C | + |   | hypothetical protein              | 51.8 | 191 |  |  |  |  |  |    |  |  |
| PSPTO5235 | C | + |   | hypothetical protein              | 56.5 | 118 |  |  |  |  |  |    |  |  |
| PSPTO5236 | C | + |   | hypothetical protein              | 58.6 | 37  |  |  |  |  |  |    |  |  |
| PSPTO5257 | C |   |   | hypothetical protein              | 59   | 216 |  |  |  |  |  |    |  |  |
| PSPTO5281 | C |   |   | hypothetical protein              | 54.3 | 78  |  |  |  |  |  |    |  |  |
| PSPTO5298 | C |   |   | hypothetical protein              | 58.7 | 63  |  |  |  |  |  |    |  |  |
| PSPTO5331 | C |   |   | hypothetical protein              | 53.8 | 630 |  |  |  |  |  |    |  |  |
| PSPTO5332 | C |   |   | trypsin domain protein            | 58.2 | 510 |  |  |  |  |  |    |  |  |
| PSPTO5345 | C | + | + | hypothetical protein              | 53.8 | 318 |  |  |  |  |  |    |  |  |
| PSPTO5346 | C | + | + | hypothetical protein              | 60.8 | 397 |  |  |  |  |  |    |  |  |
| PSPTO5347 | C | + | + | hypothetical protein              | 59.4 | 83  |  |  |  |  |  |    |  |  |
| PSPTO5348 | C | + | + | hypothetical protein              | 53.3 | 366 |  |  |  |  |  |    |  |  |
| PSPTO5349 | C | + | + | prevent-host-death family protein | 54.7 | 75  |  |  |  |  |  |    |  |  |
| PSPTO5355 | C | + | + | hypothetical protein              | 56.7 | 161 |  |  |  |  |  |    |  |  |
| PSPTO5364 | C | + | + | hypothetical protein              | 55   | 100 |  |  |  |  |  |    |  |  |
| PSPTO5365 | C | + | + | conserved domain protein          | 41.5 | 345 |  |  |  |  |  |    |  |  |
| PSPTO5373 | C | + | + | hypothetical protein              | 39.9 | 360 |  |  |  |  |  |    |  |  |

|           |   |   |   |                                |      |      |    |     |     |  |    |    |  |    |
|-----------|---|---|---|--------------------------------|------|------|----|-----|-----|--|----|----|--|----|
| PSPTO5374 | C | + | + | conserved hypothetical protein | 51.7 | 107  | Rs |     |     |  | Xf | Yp |  |    |
| PSPTO5384 | C | + |   | conserved hypothetical protein | 52.8 | 113  |    |     |     |  |    |    |  |    |
| PSPTO5385 | C | + |   | hypothetical protein           | 57.3 | 245  |    |     |     |  |    |    |  |    |
| PSPTO5386 | C | + |   | hypothetical protein           | 56.2 | 35   |    |     |     |  |    |    |  |    |
| PSPTO5392 | C | + |   | hypothetical protein           | 54.2 | 75   |    |     |     |  |    |    |  |    |
| PSPTO5410 | C |   |   | hypothetical protein           | 63.3 | 270  | Rs |     |     |  |    |    |  |    |
| PSPTO5413 | C |   |   | EF hand domain protein         | 49.1 | 792  |    |     |     |  |    |    |  |    |
| PSPTO5429 | C |   |   | hypothetical protein           | 43.9 | 38   |    |     |     |  |    |    |  |    |
| PSPTO5437 | C |   |   | hypothetical protein           | 55.7 | 227  |    |     |     |  |    |    |  |    |
| PSPTO5442 | C | + |   | hypothetical protein           | 61.1 | 119  |    |     |     |  |    |    |  |    |
| PSPTO5446 | C | + |   | hypothetical protein           | 55.8 | 40   |    |     |     |  |    |    |  |    |
| PSPTO5447 | C | + |   | conserved hypothetical protein | 51.6 | 142  |    | Xcc | Xac |  |    |    |  | St |
| PSPTO5449 | C | + |   | hypothetical protein           | 61.4 | 166  |    |     |     |  |    |    |  |    |
| PSPTO5450 | C | + |   | conserved hypothetical protein | 59.7 | 101  |    | Xcc |     |  |    |    |  |    |
| PSPTO5455 | C | + |   | conserved hypothetical protein | 60.9 | 258  |    |     |     |  |    |    |  |    |
| PSPTO5456 | C | + |   | hypothetical protein           | 58.6 | 309  |    |     |     |  |    |    |  |    |
| PSPTO5458 | C | + |   | conserved hypothetical protein | 53.4 | 158  |    |     |     |  |    |    |  |    |
| PSPTO5459 | C |   |   | hypothetical protein           | 50.5 | 31   |    |     |     |  |    |    |  |    |
| PSPTO5471 | C |   |   | hypothetical protein           | 59.6 | 142  |    |     |     |  |    |    |  |    |
| PSPTO5481 | C |   |   | hypothetical protein           | 57.4 | 1550 |    |     |     |  |    |    |  |    |
| PSPTO5495 | C | + |   | hypothetical protein           | 53.7 | 210  |    |     |     |  |    |    |  |    |
| PSPTO5496 | C | + |   | hypothetical protein           | 52.3 | 51   |    |     |     |  |    |    |  |    |
| PSPTO5497 | C | + |   | hypothetical protein           | 52.2 | 210  |    |     |     |  |    |    |  |    |
| PSPTO5513 | C |   |   | hypothetical protein           | 58.4 | 73   |    |     |     |  |    |    |  |    |

|            |    |   |   |                                |      |     |    |     |     |    |    |  |    |    |
|------------|----|---|---|--------------------------------|------|-----|----|-----|-----|----|----|--|----|----|
| PSPTO5514  | C  |   |   | conserved domain protein       | 52.1 | 103 |    |     |     |    |    |  |    |    |
| PSPTO5531  | C  |   |   | hypothetical protein           | 61.7 | 346 |    |     |     |    |    |  |    |    |
| PSPTO5552  | C  |   |   | hypothetical protein           | 61.8 | 41  |    |     |     |    |    |  |    |    |
| PSPTO5555  | C  |   |   | hypothetical protein           | 54.1 | 77  |    |     |     |    |    |  |    |    |
| PSPTO5565  | C  |   |   | hypothetical protein           | 51.6 | 213 |    |     |     |    |    |  |    |    |
| PSPTO5568  | C  |   |   | hypothetical protein           | 52.4 | 49  |    |     |     |    |    |  |    |    |
| PSPTO5583  | C  |   |   | Ais protein, putative          | 52.6 | 228 |    |     |     |    |    |  | Ec | St |
| PSPTO5592  | C  |   |   | hypothetical protein           | 53.5 | 293 |    |     |     |    |    |  |    |    |
| PSPTOA0015 | pA | + | + | conserved hypothetical protein | 50.5 | 72  |    |     |     |    |    |  |    |    |
| PSPTOA0022 | pA | + | + | hypothetical protein           | 54.2 | 193 |    |     |     |    |    |  |    |    |
| PSPTOA0023 | pA | + | + | hypothetical protein           | 65.5 | 116 |    |     |     |    |    |  |    |    |
| PSPTOA0024 | pA | + | + | hypothetical protein           | 56   | 125 |    |     |     |    |    |  |    |    |
| PSPTOA0025 | pA | + | + | conserved hypothetical protein | 56.4 | 278 | Rs |     |     |    |    |  | Ec |    |
| PSPTOA0026 | pA | + | + | conserved hypothetical protein | 52.7 | 62  |    |     |     |    |    |  |    |    |
| PSPTOA0031 | pA | + | + | conserved hypothetical protein | 50.6 | 393 | Rs | Xcc |     |    |    |  | Yp | Ec |
| PSPTOA0033 | pA | + | + | hypothetical protein           | 56.1 | 132 |    |     |     |    |    |  |    |    |
| PSPTOA0038 | pA | + | + | hypothetical protein           | 40.4 | 61  |    |     |     |    |    |  |    |    |
| PSPTOA0040 | pA | + |   | conserved hypothetical protein | 55   | 177 |    |     |     |    |    |  | Yp | Ec |
| PSPTOA0046 | pA | + |   | hypothetical protein           | 57.5 | 69  |    |     |     |    |    |  |    |    |
| PSPTOA0057 | pA | + |   | conserved hypothetical protein | 57.1 | 91  |    | Xcc | Xac | At | Xf |  |    |    |
| PSPTOA0058 | pA | + |   | conserved hypothetical protein | 57.1 | 66  |    |     |     |    | Xf |  | Ec |    |
| PSPTOA0061 | pA | + |   | hypothetical protein           | 56.8 | 78  |    |     |     |    |    |  |    |    |
| PSPTOA0069 | pA |   |   | hypothetical protein           | 51.7 | 140 |    |     |     |    |    |  |    |    |
| PSPTOA0070 | pA |   |   | hypothetical protein           | 59.3 | 207 |    |     |     |    |    |  |    |    |

|            |    |   |  |                                |      |     |    |     |     |  |  |    |    |    |
|------------|----|---|--|--------------------------------|------|-----|----|-----|-----|--|--|----|----|----|
| PSPTOB0003 | pB | + |  | conserved hypothetical protein | 44.8 | 157 |    | Xcc |     |  |  | Yp |    |    |
| PSPTOB0006 | pB | + |  | hypothetical protein           | 61.9 | 42  |    |     |     |  |  |    |    |    |
| PSPTOB0012 | pB | + |  | hypothetical protein           | 56.8 | 352 |    |     | Xac |  |  |    |    |    |
| PSPTOB0015 | pB | + |  | hypothetical protein           | 50   | 98  |    |     |     |  |  |    |    |    |
| PSPTOB0016 | pB | + |  | conserved domain protein       | 57.3 | 117 |    |     |     |  |  |    |    |    |
| PSPTOB0020 | pB | + |  | hypothetical protein           | 53.9 | 315 |    |     |     |  |  |    |    |    |
| PSPTOB0023 | pB | + |  | hypothetical protein           | 52.5 | 73  |    |     |     |  |  |    |    |    |
| PSPTOB0027 | pB | + |  | hypothetical protein           | 57.7 | 138 |    |     |     |  |  |    |    |    |
| PSPTOB0028 | pB | + |  | hypothetical protein           | 68.1 | 91  |    |     |     |  |  |    |    |    |
| PSPTOB0029 | pB | + |  | hypothetical protein           | 58.7 | 84  |    |     |     |  |  |    |    |    |
| PSPTOB0030 | pB | + |  | conserved hypothetical protein | 57.1 | 278 | Rs |     |     |  |  |    | Ec |    |
| PSPTOB0031 | pB | + |  | conserved hypothetical protein | 49.5 | 66  |    |     |     |  |  |    |    |    |
| PSPTOB0033 | pB | + |  | hypothetical protein           | 48.4 | 93  |    |     |     |  |  |    |    |    |
| PSPTOB0034 | pB | + |  | hypothetical protein           | 52.3 | 114 |    |     |     |  |  |    |    |    |
| PSPTOB0037 | pB | + |  | hypothetical protein           | 50.7 | 69  |    |     |     |  |  |    |    |    |
| PSPTOB0044 | pB | + |  | hypothetical protein           | 37.2 | 61  |    |     |     |  |  |    |    |    |
| PSPTOB0046 | pB | + |  | conserved hypothetical protein | 55.6 | 177 |    |     |     |  |  | Yp | Ec | St |
| PSPTOB0047 | pB | + |  | hypothetical protein           | 51.3 | 102 |    |     |     |  |  |    |    |    |
| PSPTOB0053 | pB | + |  | hypothetical protein           | 55.7 | 231 |    |     |     |  |  |    |    |    |
| PSPTOB0055 | pB | + |  | hypothetical protein           | 56.8 | 81  |    |     |     |  |  |    |    |    |
| PSPTOB0070 | pB | + |  | hypothetical protein           | 54.1 | 90  |    |     |     |  |  |    |    |    |
| PSPTOB0072 | pB | + |  | conserved hypothetical protein | 59   | 400 |    |     |     |  |  |    |    |    |
| PSPTOB0073 | pB | + |  | PIN domain protein             | 57.3 | 125 |    |     |     |  |  |    |    |    |
| PSPTOB0074 | pB | + |  | conserved hypothetical protein | 56.6 | 66  |    |     |     |  |  |    |    |    |

The inferred proteomes of eight pathogenic bacteria were searched with the 811 genes unique to DC3000 by using a BLASTP cutoff criterion of  $E < 10^{-5}$  which will identify putative homologs as well as paralogous gene family members. Rs = *Ralstonia solanacearum*, Xac = *Xanthomonas axonopodis* pv. *citri*, Xcc = *Xanthomonas campestris* pv. *campestris*, At = *Agrobacterium tumefaciens* (U. Wash seq.), Xf = *Xylella fastidiosa*, Yp = *Yersinia pestis* CO92, St = *Salmonella typhimurium* LT2, and Ec = *Escherichia coli* O157:H7 EDL933.

<sup>a</sup> Individual unique genes that cluster with one another at a density of at least three genes within a 10-kb region.

<sup>b</sup> Genes or clusters (as defined in <sup>a</sup>) that are present within 20 kb of TTSS components and effectors.

<sup>c</sup> The annotation of some of the genes in the table is based on multiple alignments to a nonredundant amino acid database as well as Hidden Markov Models (HMMs), which identify domains in protein families (Pfams and TIGRFAMs). Additional information on the individual loci and protein families is available in The Institute for Genomic Research Comprehensive Microbial Resource (<http://www.tigr.org/tigr-scripts/CMR2/CMRHomePage.spl>).
