# Supplementary material
Source: PubMed Central journal article supplement (PMC193536)

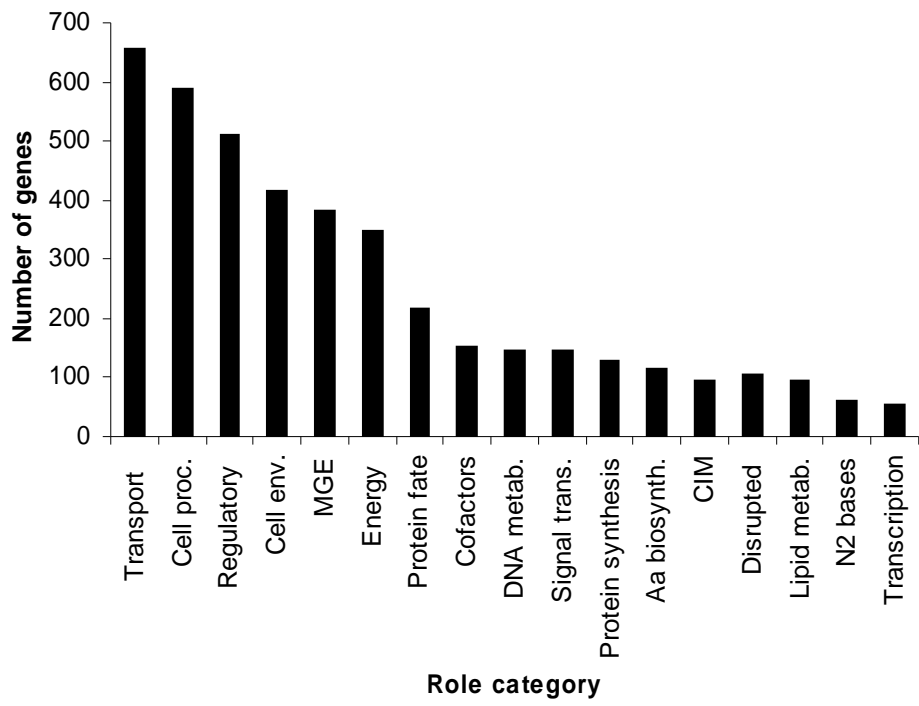

Supplement: pnas_1731982100_2.pdf [file pnas_1731982100_2.pdf]

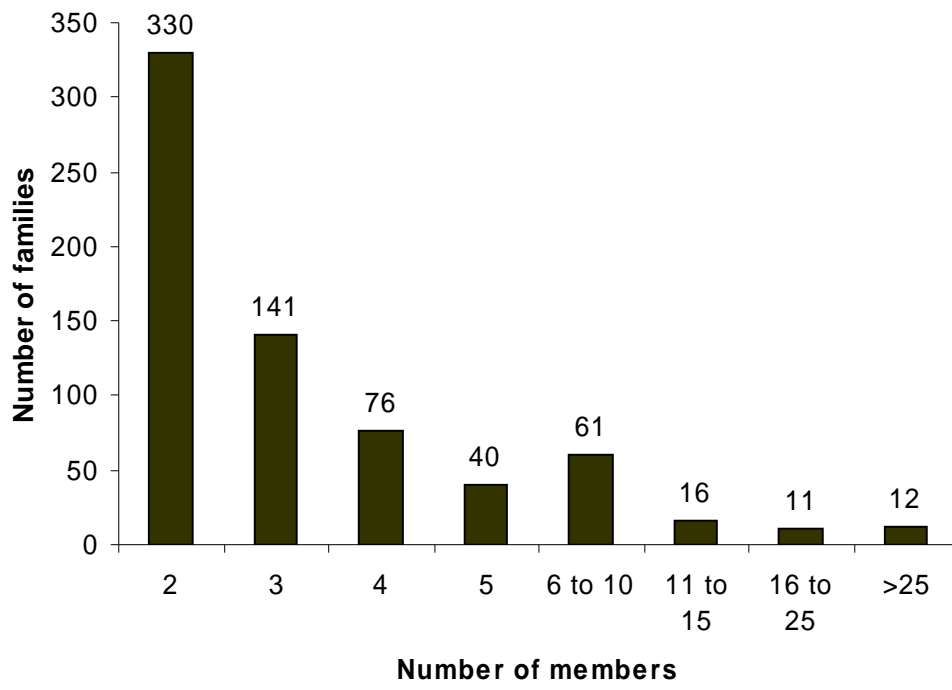

Supplement: pnas_1731982100_4.pdf [file pnas_1731982100_4.pdf]
